# Supplementary material
Source: Royal Society of Chemistry journal article supplement (doi:10.1039/d5cy01380a)
Supplement: d5cy01380a1.pdf [file d5cy01380a1.pdf]

## Supporting Information

### **CO<sub>2</sub> mediated direct *N*-formylation of nitro compounds by metal-organic framework node-supported cobalt(II) catalyst**

**Swapnaneel Sarmah,† Chhaya Thadhani,† Aditya Kumar, Kuntal Manna\***

[<sup>a</sup>]Department of Chemistry, Indian Institute of Technology Delhi, Hauz Khas,  
New Delhi 110016, India

\*Email: [kmanna@chemistry.iitd.ac.in](mailto:kmanna@chemistry.iitd.ac.in)

### Table of contents

|                                                                   |                |
|-------------------------------------------------------------------|----------------|
| <b>1. General experiment</b>                                      | <b>S2-S3</b>   |
| <b>2. Synthesis and characterization of UiO-67 and UiO-67-CoH</b> | <b>S3-S7</b>   |
| <b>3. Catalytic reactions with UiO-67-CoH</b>                     | <b>S7-S15</b>  |
| <b>4. Kinetic studies</b>                                         | <b>S16</b>     |
| <b>5. X-ray absorption spectroscopic analysis</b>                 | <b>S17-S19</b> |
| <b>6. DFT calculations</b>                                        | <b>S20-S35</b> |
| <b>7. XPS analysis</b>                                            | <b>S36-S38</b> |
| <b>8. Characterization of the <i>N</i>-formylated products</b>    | <b>S39-S48</b> |
| <b>9. References</b>                                              | <b>S50-S51</b> |

**1. General experiment.** All the experiments were performed under inert conditions inside the glovebox, except if any case was demonstrated. All the solvents were purchased from Finar and used without further purification. Tetrahydrofuran was dried with calcium hydride followed by distillation over Na/benzophenone. All the reagents are commercially available and used directly as received. 4,4'-Biphenyldicarboxylic acid was purchased from Alfa Aesar, and  $ZrCl_4$  was purchased from Sigma Aldrich. Thermogravimetric analysis (TGA) was performed on a PerkinElmer TGA7 system on well-ground samples in a flowing nitrogen atmosphere with a heating rate of  $10\text{ }^\circ\text{C}/\text{min}$  with a range of  $40\text{-}800\text{ }^\circ\text{C}$ . Room temperature powder X-ray diffraction data were collected on a Bruker Advance diffractometer using Ni-filtered  $\text{Cu K}\alpha$  radiation ( $\lambda = 1.5406\text{ \AA}$ ). Data were collected with a step size of  $0.05^\circ$  and at count time of 1s per step over the range  $4^\circ < 2\theta < 70^\circ$ . The experimental and simulated PXRD patterns are in good agreement, indicating the monophasic nature of the bulk samples. For powder X-ray diffraction measurement of MOFs, a moist sample was mounted on a PXRD groove. After catalysis, UiO-Co was recovered after centrifugation and stored in THF. Just before the PXRD measurement, the THF was removed, and the moist sample was mounted on a PXRD groove. The catalysis was carried out without any mechanical stirring, and the recovered MOF was not dried before the measurement of PXRD to prevent any mechanical degradation and pore collapse of the MOF. For the product analysis using GC-MS, the chromatographic conditions were as follows: He was used as the carrier gas with a flow rate of  $1\text{ mL min}^{-1}$ , an injection volume of  $5.0\text{ }\mu\text{L}$ , an initial column oven temperature of  $100\text{ }^\circ\text{C}$  which was gradually increased to  $250\text{ }^\circ\text{C}$  at a rate of  $5\text{ }^\circ\text{C min}^{-1}$  and a detector temperature of  $250\text{ }^\circ\text{C}$ . ICP-OES measurements were conducted using an Agilent 5110 ICP-OES with data analysis performed using a Dichroic Spectral Combiner (DSC). Samples were diluted in a 5%  $\text{HNO}_3$  matrix and analyzed using a six-point calibration curve ranging from 0.1 ppm to 20 ppm with the correlation coefficient  $>0.9990$  for all the analytes. All the formylation reactions were done using 100 mL Parr pressure vessels (4793 (VGR)-T-SS-3000-DVD). The vessel was pressurized directly from a  $\text{CO}_2$  gas tank using a gauge (0-3000 psi displayed, 0-200 bar). The chemical state of transition elements was analyzed with X-ray photoelectron spectroscopy (XPS) using a PHI 5000 VersaProbe III spectrometer with an  $\text{Al-K}\alpha$  ( $h\nu = 1486.6\text{ eV}$ ) X-ray source. MOF samples were vacuum dried at room temperature before being analysed in an ultra-high vacuum environment. Surface area and pore volume were measured using a BELLSORP MAX II high-performance gas and vapor adsorption system, equipped with three microporous ports. For BET surface area measurement, the MOF sample was dried via a freeze-

drying method, which involved first soaking the MOF with benzene, followed by freezing the slurry at -10 °C and then slowly drying it under vacuum at the same temperature. The morphology and the chemical composition of the MOFs were examined using a Zeiss FE-SEM Ultra Plus55 field emission scanning microscope (FE-EM) operating at 20 kV. After vacuum drying, a very small amount of the powder samples of MOF (1-2 mg) were dispersed on the carbon tape for FE-SEM imaging. Infra-red (IR) spectra of samples were recorded with FT-IR Spectrometer (MS-632). First, the MOF samples were vacuum dried at 100 °C to remove any residual moisture before being transferred into the glovebox. A KBr pellet of the powdered sample was then prepared and kept under inert conditions while IR spectra were recorded in a nitrogen atmosphere. EPR spectra were recorded on a Bruker A300-9.5/12/S/W spectrometer operating in the X-band region, and the spectra were simulated using Bruker EPR Simfonia software. The ESI-mass spectra data was recorded on a Waters Xevo-G2XQTOF Micro-TOF QII instrument.

## **2. Synthesis and characterization of UiO-67, UiO-67-CoCl and UiO-67-CoH.**

**2.1 Synthesis of UiO-67.**<sup>1</sup> UiO-67 MOF was synthesized by a solvothermal reaction between ZrCl<sub>4</sub> and biphenyl-4,4'-dicarboxylic acid (H<sub>2</sub>bpdc). First, ZrCl<sub>4</sub> (16.75 mg, 0.0718 mmol) was dissolved in 1.25 mL DMF, and then 0.125 mL HCl was added. After that, the mixture was sonicated at room temperature in a 5 mL vial until a clear solution was formed. Additionally, biphenyl-4,4'-dicarboxylic acid (22.5 mg, 0.0928 mmol) was dissolved in 2.5 mL of DMF and sonicated. The two solutions were then mixed, producing a white colored mixture. The resultant mixture was then placed in a pre-heated oven at 80 °C for 20 h. After cooling to room temperature, the white crystalline solid, UiO-67 MOF was collected via centrifugation, which was then washed with DMF and THF for several times. The final product was then stored in THF at room temperature.

**2.2 Synthesis of UiO-67-CoCl.**<sup>2</sup> Inside a glovebox, UiO-67 (0.016 g, 0.0075 mmol) was suspended in 1 mL of THF and then treated with *n*-BuLi (27 μL, 1.65 M in cyclohexane). The mixture was stirred at room temperature for 2 h to initiate the post-synthetic metalation of the MOF. Excess *n*-BuLi was removed by repeated washing with THF. Additionally, a 15 mL THF solution containing CoCl<sub>2</sub>·6H<sub>2</sub>O (0.014 g, 0.058 mmol) was added, and the reaction mixture was stirred for 6 h at room temperature to furnish Zr-node supported cobalt chloride (UiO-67-CoCl) as a blue crystalline solid, which was then thoroughly washed with THF.

**2.3 Synthesis of UiO-67-CoH.** Inside a glovebox, UiO-67-CoCl (0.014 g, 0.006 mmol) was first dispersed in THF and then treated with NaEt<sub>3</sub>BH (21  $\mu$ L, 1 M in toluene). The mixture was stirred at room temperature for 1 h, initiating the halide-hydride exchange reaction and giving UiO-67-CoH as a black solid. The resulting product was then thoroughly washed with THF multiple times and stored in THF within the glovebox. Thermogravimetric analysis (TGA) suggested a 30% solvent weight loss for UiO-67-CoH and inductively coupled plasma spectroscopy (ICP-OES) revealed iron loading of 45% relative to the  $\mu_3$ -OH groups of the digested MOF corresponding to the molecular formula of Zr<sub>6</sub>O<sub>44</sub>C<sub>84</sub>H<sub>48</sub>Li<sub>2.2</sub>Co<sub>1.8</sub>H<sub>1.8</sub>.

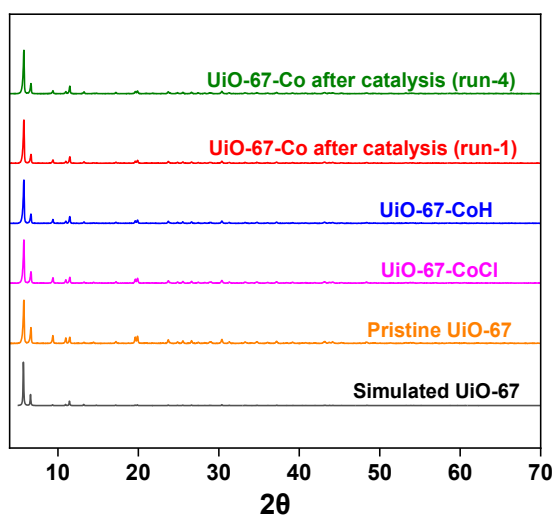

**Figure S1.** PXRD patterns of simulated UiO-67 MOF (black), freshly prepared pristine UiO-67 (orange), UiO-67-CoCl (magenta), UiO-67-CoH (blue), UiO-67-Co after run-1 of catalysis (red) and UiO-67-Co after run-4 of catalysis (olive).

**2.4 Synthesis of UiO-66-CoH.** Firstly, a solvothermal reaction was carried out between benzene-1,4-dicarboxylic acid (0.05 g, 0.300 mmol) in 1.5 mL DMF and zirconium(IV) chloride (0.069 g, 0.296 mmol) in 1.5 mL DMF in a teflon-lined hydrothermal autoclave in a preheated oven at 120 °C for 24 h to generate a white crystalline solid, UiO-66 MOF. The synthesized MOF was then isolated, washed three times with DMF and with THF. Following this, for post-synthetic metalation, UiO-66 MOF (0.013 g, 0.0078 mmol) in THF was treated with *n*-BuLi (28  $\mu$ L, 1.65 M in cyclohexane) and stirred for 2 h inside a glovebox. Excess *n*-BuLi was removed by washing followed by the addition of CoCl<sub>2</sub>·6H<sub>2</sub>O (0.014 g, 0.058 mmol) in 15 mL THF. The mixture was stirred for 6 hours to afford a blue crystalline solid, UiO-66-CoCl. Next, UiO-66-CoCl (0.011 mg, 0.0060 mmol) in THF was reacted with NaEt<sub>3</sub>BH (19  $\mu$ L, 1 M in toluene) and stirred for 1 h, initiating halide-hydride exchange to yield UiO-66-CoH, a black solid which was then washed and stored in THF within the glovebox. ICP-OES

confirmed 40% cobalt loading relative to  $\mu_3$ -OH groups corresponding to the molecular formula of  $Zr_6O_{32}C_{48}H_{24}Li_{2.4}Co_{1.6}H_{1.6}$ .

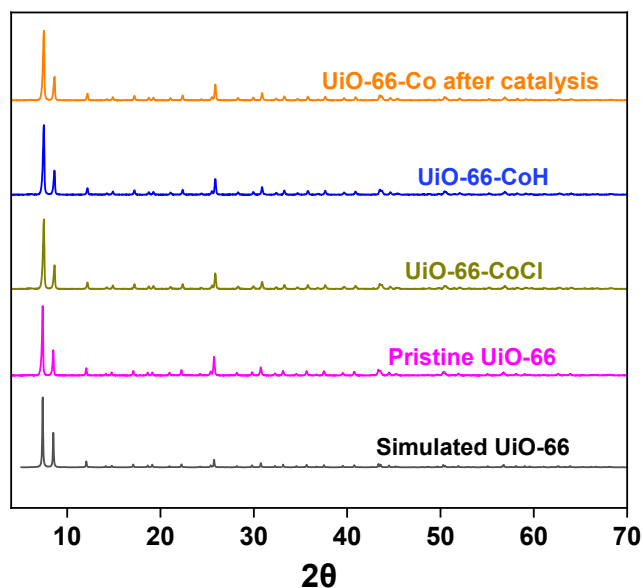

**Figure S2.** PXRD patterns of simulated UiO-66 MOF (black), freshly prepared pristine UiO-66 (magenta), UiO-66-CoCl (olive), UiO-66-CoH (dark yellow), UiO-66-Co after run 1 of catalysis (orange).

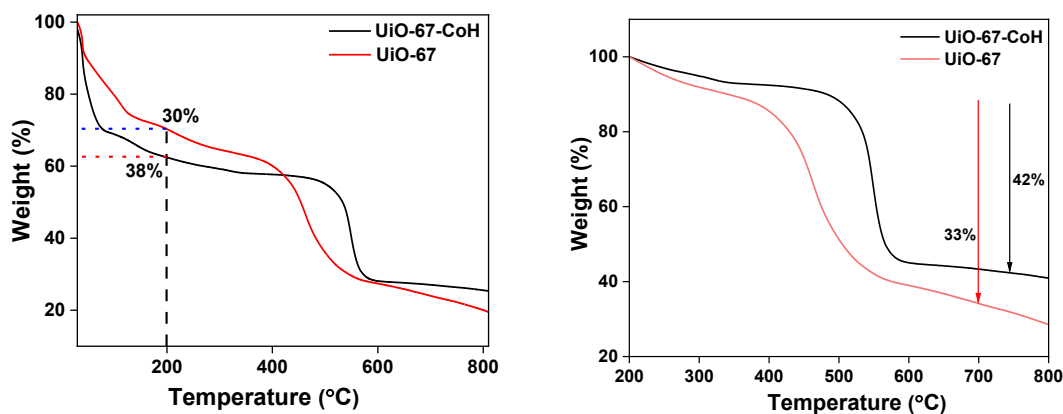

**Figure S3.** a) TGA curve of freshly prepared UiO-67 and UiO-67-CoH. A solvent weight loss of 38% in UiO-67 (red) and 30% in UiO-67-CoH (blue) was observed from 40 °C to 200 °C. b) TGA curve of freshly prepared UiO-67 (red) and UiO-67-CoH (blue) from 200 °C to 800 °C. The increased weight of metalated MOFs is due to the presence of cobalt within the MOF.

**Table S1.** Determination of defects in UiO-67 and UiO-67-CoH by TGA analysis.

|                   |            | <b>Solvent%</b> | <b>Ligand%</b> | <b>Residue%</b> |
|-------------------|------------|-----------------|----------------|-----------------|
| <b>UiO-67</b>     | Calculated | -               | 65             | 35              |
|                   | TGA        | 38              | 34             | 28              |
|                   | Corrected  | -               | 67             | 33              |
| <b>UiO-67-CoH</b> | Calculated | -               | 61             | 39              |
|                   | TGA        | 30              | 43             | 27              |
|                   | Corrected  | -               | 58             | 42              |

**Theoretical Calculations:**

- a) 1 mole of  $Zr_6O_4(OH)_4(C_{14}H_8O_4)_6 = 6$  moles of  $ZrO_2$   
 $2120.64 \text{ g of } Zr_6O_4(OH)_4(C_{14}H_8O_4) = (739.32/2120.64)*100 = 34.86\% \sim 35\%$  of residue  
% Ligand =  $(100-35)\% = 65\%$
- b) 1 mole of  $Zr_6O_4(OCOH)_{1.8}(OLi)_{2.2}(C_{14}H_8O_4)_6 = 6$  moles of  $ZrO_2$  and 1.8 mole of  $CoO$   
 $2239.77 \text{ g of } Zr_6O_4(OCOH)_{1.8}(OLi)_{2.2}(C_{14}H_8O_4)_6 = (874.194/2239.77)*100 = 39\%$  residue  
% Ligand =  $(100-39)\% = 61\%$

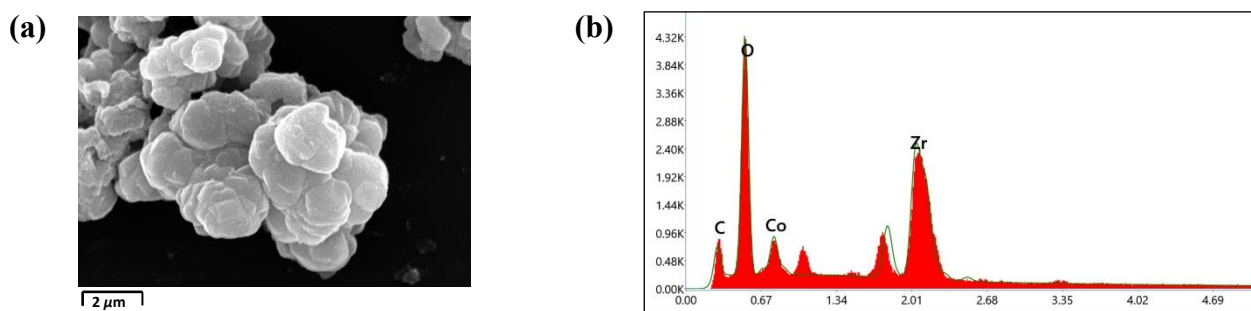

**Figure S4.** a) SEM image and b) SEM-EDX analysis of UiO-67-CoH. SEM image revealed octahedral-shaped UiO-67-CoH particles with an average size of 235 nm.

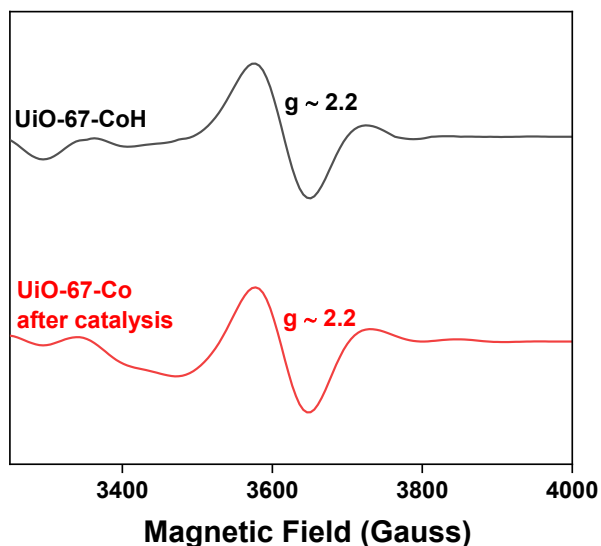

**Figure S5.** Room temperature X-band EPR spectra of solid UiO-67-CoH and UiO-67-Co after catalysis.<sup>3</sup>

### 3. Catalytic reactions with UiO-67-CoH.

#### 3.1 General procedure for *N*-formylation of nitro compounds catalysed by UiO-67-CoH.

Inside the glovebox, UiO-67-CoH (0.75 mol% Co), was initially dissolved in 3 mL of solvent and transferred into a glass liner. Then various nitro substrates (1.3 mmol) along with phenylsilane (2.5 equiv.) were added to the glass liner. Following this, the liner was carefully placed inside a high-pressure Parr reactor and sealed properly. The sealed Parr reactor was then taken out from the glovebox and purged with CO<sub>2</sub> for 3 times. Then the reactor was pressurized to 5-15 bar CO<sub>2</sub> and subjected to heating at 100-140 °C for a period of 24 to 48 h without any mechanical stirring. After the completion of the reaction, the reactor was cooled to room temperature, and the pressure was released gently. The reaction mixture was then centrifuged to separate out the solid MOF, and the crude products were then analysed using GC-MS. Conversion of the reactant was analyzed by GC-MS using area-percent method and yield of the product was determined by GC using mesitylene as an internal standard.

### 3.2 A Typical procedure for UiO-67-CoH catalyzed *N*-formylation of *p*-nitrotoluene.

*p*-Nitrotoluene was chosen as the ideal substrate for carrying out the *N*-formylation reaction.

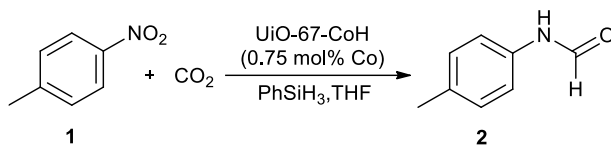

Inside the glovebox, UiO-67-CoH (0.75 mol% of Co) in 3mL of THF was transferred into a glass liner. To this, *p*-nitrotoluene (1.3 mmol) and phenylsilane (2.5 equiv.) were added. The glass liner was then placed inside a high-pressure Parr reactor and subsequently sealed. The reactor was then taken out of the glovebox and purged 3 times with CO<sub>2</sub>. It was then pressurized to 10 bar of CO<sub>2</sub> and heated at 120 °C for 36 h without any mechanical stirring. After the completion of reaction, the reactor was cooled to room temperature, and the pressure was released gradually. The MOF was then separated from the reaction mixture by centrifugation. Conversion of the reactant was analyzed by GC-MS using area-percent method and yield of the product was determined by GC using mesitylene as the internal standard. After completion of the reaction, the combined organic extracts were concentrated in vacuo followed by column chromatography using hexane and ethyl acetate (5:1) as an eluent to yield *N*-*p*-tolylformamide product.



**Table S3. Control experiments for *N*-formylation of *p*-nitrotoluene.<sup>a</sup>**

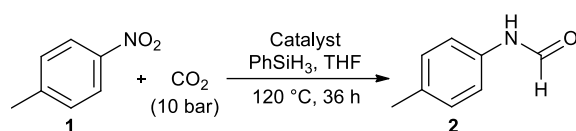

| Entry No.       | Catalyst            | % Conversion of 1 <sup>c</sup> | % Yield of 2 <sup>d</sup> |
|-----------------|---------------------|--------------------------------|---------------------------|
| 1               | UiO-67-CoH          | 99                             | 92                        |
| 2 <sup>b</sup>  | UiO-67-CoH          | 65                             | 0                         |
| 3               | No catalyst         | 0                              | 0                         |
| 4               | UiO-67              | 14                             | 13                        |
| 5               | UiO-67-CoCl         | 31                             | 28                        |
| 6               | CoCl <sub>2</sub>   | 10                             | 8                         |
| 7               | Co@UiO-67           | 22                             | 4                         |
| 8               | Co nanoparticles    | 18                             | 11                        |
| 9               | Co(OH) <sub>2</sub> | 0                              | 0                         |
| 10              | UiO-66-CoH          | 72                             | 48                        |
| 11 <sup>e</sup> | UiO-67-CoH          | 62                             | 29                        |
| 12 <sup>f</sup> | UiO-67-CoH          | 51                             | 20                        |

<sup>a</sup>Reaction conditions: 1.3 mmol of *p*-nitrotoluene, 0.012 g of UiO-67-CoH (0.75 mol% of Co), 10 bar CO<sub>2</sub> and 3 mL of solvent. <sup>b</sup>Nitrogen (10 bar) was used instead of CO<sub>2</sub>. <sup>c</sup>Conversion of *p*-nitrotoluene was determined by GC-MS using area-percentage method. <sup>d</sup>Yield of *N*-*p*-tolylformamide was determined by GC using mesitylene as an internal standard. <sup>e</sup>1:1 mixture (5 bar CO<sub>2</sub> + 5 bar N<sub>2</sub>) was used instead of CO<sub>2</sub>. <sup>f</sup>1:1 mixture (2 bar CO<sub>2</sub> + 8 bar N<sub>2</sub>) was used instead of CO<sub>2</sub>.

### 3.3. Blank reaction of UiO-67-CoH with *p*-nitrotoluene without CO<sub>2</sub>.

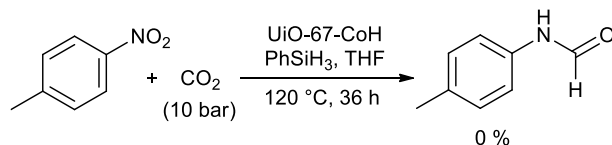

UiO-67-CoH (0.75 mol% of Co) in 3mL of THF was transferred into a glass liner. To this, *p*-nitrotoluene (1.3 mmol) and phenylsilane (2.5 equiv.) were added. The glass liner was then placed inside a high-pressure Parr reactor and subsequently sealed. The reactor was then taken out of the glovebox and purged 3 times with CO<sub>2</sub>. It was then pressurized to 10 bar of CO<sub>2</sub> and heated at 120 °C for 36 h without any mechanical stirring. After the completion of the reaction, the reactor was cooled to room temperature, and the pressure was released gradually. The MOF was

then separated from the reaction mixture by centrifugation, and the crude products were analyzed using GC-MS. The absence of *N-p*-tolylformamide confirmed that CO<sub>2</sub> was solely responsible for the *N*-formylation reaction with UiO-67-CoH MOF.

### 3.4. Test for “heterogeneity” of UiO-67-CoH in the *N*-formylation of *p*-nitrotoluene.

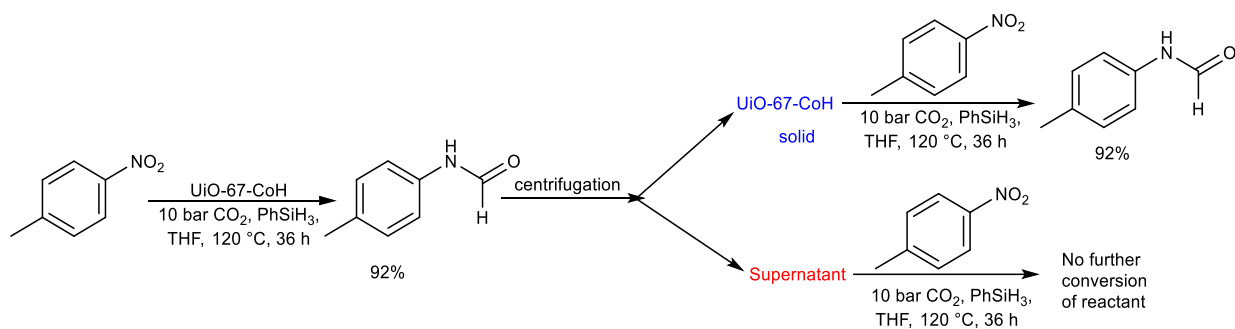

**Figure S6.** Hot filtration test of UiO-67-CoH for *N*-formylation of *p*-nitrotoluene.

In a glovebox, UiO-67-CoH (0.75 mol% of Co) in 3 mL of THF was transferred into a glass liner. To this mixture, *p*-nitrotoluene (1.3 mmol) and phenylsilane (2.5 equiv.) were added. The glass liner was then placed inside a high-pressure Parr reactor and subsequently sealed. The reactor was then taken out of the glovebox and purged 2-3 times with CO<sub>2</sub>. It was then pressurized to 10 bar of CO<sub>2</sub> and heated at 120 °C for 36 h without any mechanical stirring. After the completion of the reaction, the pressure of the reactor was released. The solid MOF was removed from suspension to separate the solid and the supernatant, inside the glove box and washed with THF multiple times. The conversion analyzed by taking aliquots from the organic extract gave 92% of *N-p*-tolylformamide.

Two reactions were set up separately in two different Parr reactors, one with the solid MOF and the other one with the supernatant recovered from the previous reaction. The extracted solid and the supernatant were added to two separate liners, and to both the liners, *p*-nitrotoluene (1.3 mmol), phenylsilane (2.5 equiv.), and 3 mL of THF were added. Then both the liners were fitted into two separate Parr reactors and sealed. The sealed Parr reactors were then taken out from the glovebox and purged with CO<sub>2</sub> 3 times. The reactors were pressurized to 10 bar of CO<sub>2</sub> and heated at 120 °C for 36 h without any mechanical stirring. After the completion of the reaction, the reactor was cooled to room temperature, and the pressure was released gradually. GC-MS analysis showed that the reaction with the solid MOF gave 90% yield of the desired product, while the reaction with the supernatant gave 0% conversion. This

experiment excludes the potential of any leached Co-species responsible for catalysis and confirms that solid UiO-67-CoH was the actual catalyst for the formylation of *p*-nitrotoluene.

### 3.5. Hg Test.<sup>4</sup>

The catalytic activity of UiO-67-CoH in the *N*-formylation reaction was examined in the presence of a small amount of Hg<sup>0</sup>. This was done to investigate whether any leached Co nanoparticles formed during the reaction participated in the catalytic reaction. The results showed that the rate of *N*-formylation reaction remained unchanged upon addition of Hg<sup>0</sup>. This indicated that any potential leached Co-nanoparticles were not responsible for carrying out the catalytic reaction. These findings confirm that UiO-67-CoH acts as the actual catalyst in this reaction. Hence, it is concluded that UiO-67-CoH is the true catalyst for the *N*-formylation reaction. The experimental procedure of the reaction is as follows:

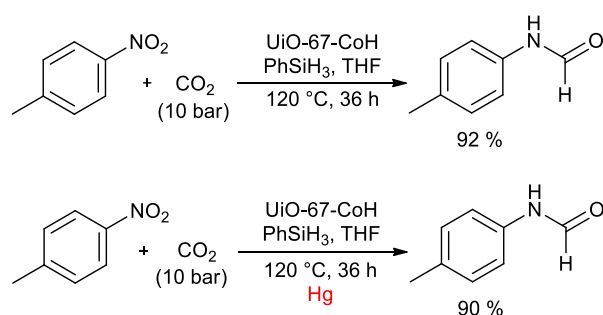

**Figure S7.** Hg test in the *N*-formylation of *p*-nitrotoluene catalyzed by UiO-67-CoH.

In a glovebox, UiO-67-CoH (0.75 mol% of Co) in 3 mL of THF was transferred into two separate glass liners. Each of the glass liners was charged with *p*-nitrotoluene (1.3 mmol) and phenylsilane (2.5 equiv.). To one of the liners, a drop of mercury was then added. Both the liners were placed inside a high-pressure Parr reactor and subsequently sealed. The sealed Parr reactors were then taken out of the glovebox and purged with CO<sub>2</sub> 3 times. The reactors were pressurized to 10 bar of CO<sub>2</sub> and heated at 120 °C for 36 h without any mechanical stirring. After the completion of the reaction, the reactors were cooled to room temperature, and the pressure was released gradually. The MOF was then separated from the reaction mixtures by centrifugation, and the crude products were analyzed using GC-MS, which indicated almost similar results for both reactions. Hence, it can be concluded that leached Co particles did not participate in the catalytic activity, and that UiO-67-CoH acted as the actual catalyst.

### 3.6. Recycling of UiO-67-CoH for the formylation of *p*-nitrotoluene.

The recycle and reuse experiment was conducted to check the stability of UiO-67-CoH MOF-catalyst (Table S4). The detailed procedure of the recycling experiment is given below.

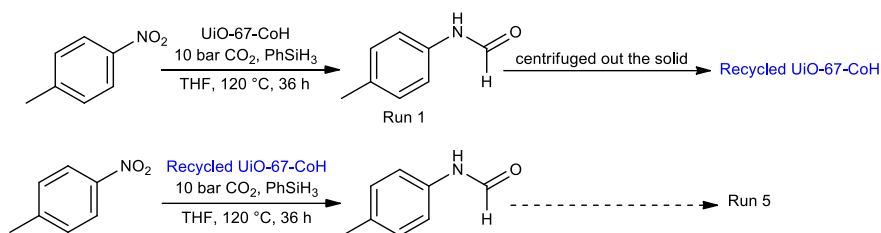

**Figure S8.** Recycle and reuse of UiO-67-CoH for the formylation of *p*-nitrotoluene.

Initially, in a glovebox, UiO-67-CoH (0.012g, 0.75 mol% of Co) in 3 mL of THF was transferred into a glass liner. To this mixture, *p*-nitrotoluene (1.3 mmol) and phenylsilane (2.5 equiv.) were added. The glass liner was then placed inside a high-pressure Parr reactor and subsequently sealed. The reactor was then taken out of the glovebox and purged 3 times with CO<sub>2</sub>. It was then pressurized to 10 bar of CO<sub>2</sub> and heated at 120 °C for 36 h without any mechanical stirring. After the completion of the reaction, the reactor was cooled to room temperature, and the pressure was released gradually. The Parr reactor was then taken inside the glovebox, the solid MOF was centrifuged out from the suspension and washed with THF several times. The formylated product was analysed by GC-MS. The collected solid MOF was then reused for further reactions.

Inside the glovebox, the recovered MOF-catalyst was again added to the glass liner. 3 ml THF and *p*-nitrotoluene (1.3 mmol) were added to the glass tube and sealed in a Parr reactor. The Parr reactor was taken out from the glove box and was purged with the CO<sub>2</sub> gas for 2-3 times and then pressurized to 10 bar of CO<sub>2</sub>. The reactor was heated at 120 °C for 36 h without any mechanical stirring. After the reaction, the solution was analyzed in the same way as mentioned previously in run 1. The recycling and reuse experiments were performed up to 4 times in total.

**Table S4.** %GC Yield of *N*-*p*-tolylformamide, the leaching of Co and Zr at various runs of the recycling of UiO-67-CoH in the *N*-formylation of *p*-nitrotoluene.

| No. of Run | Time | %GC yield of <i>N-p-tolylformamide</i> | % Leaching (Co, Zr) |
|------------|------|----------------------------------------|---------------------|
| Run-1      | 36 h | 92                                     | 0.05, 0.042         |
| Run-2      | 36 h | 89                                     |                     |
| Run-3      | 36 h | 88                                     | 0.09, 0.074         |
| Run-4      | 36 h | 82                                     |                     |
| Run-5      | 36 h | 78                                     |                     |

### 3.7. *N*-Formylation of *p*-nitrotoluene using Co(0) and Co@UiO-67.

#### 3.7.1. Co(0) catalyzed *N*-formylation of nitro substrates.

Initially, CoCl<sub>2</sub>·6H<sub>2</sub>O (0.0024 g, 0.0084 mmol) was introduced to a glass vial containing 2 mL of THF inside the glovebox. Then, NaEt<sub>3</sub>BH (12 μL, 1 M in toluene) was added, and the mixture was stirred gently for 1 h to form black coloured Co nanoparticles. The resultant black solid was thoroughly washed with THF and dried. Then, a small amount of Co nanoparticles (0.25 mg, 0.0040 mmol Co) in 3 mL of THF was transferred into a glass liner, followed by the addition of *p*-nitrotoluene (1.3 mmol) and phenylsilane (2.5 equiv.) inside the glovebox and sealed in a Parr reactor. The Parr reactor was taken out of the glove box and was purged with the CO<sub>2</sub> gas for 2-3 times and then pressurized to 10 bar of CO<sub>2</sub>. The reactor was heated at 120 °C for 36 h without any mechanical stirring. After the completion of the reaction, the reactor was cooled to room temperature, and the pressure was released gradually. The MOF was then separated from the reaction mixture by centrifugation, and the crude products were analyzed using GC-MS, which suggested that a negligible amount of the formylated product was formed from Co nanoparticles.

#### 3.7.2. Co@UiO-67 catalyzed *N*-formylation.

CoCl<sub>2</sub>·6H<sub>2</sub>O (0.014 g, 0.058 mmol) was dissolved in 2 mL of ethyl acetate in a 25 mL round-bottom flask, and UiO-67 MOF (0.075 mg) was added to it. The mixture was heated at 50 °C for 48 h. Upon cooling to room temperature, the mixture was centrifuged out to isolate the MOF, which was washed and dried to afford UiO-67-CoCl. Then, NaBH<sub>4</sub> (0.015 g) was dissolved in 8 mL of deionized water, added to UiO-67-CoCl (0.070 mg) and stirred for 30 minutes. The solid product was collected by filtration, washed with deionized water, and dried to yield black Co@UiO-67 powder. The Co@UiO-67 sample was then activated at 150 °C for 12 h under high vacuum. For the catalytic reaction, inside a glovebox, 6 mg of Co@UiO-67 (0.002 mmol Co) dissolved in 3 mL of THF was added to *p*-nitrotoluene (1.3 mmol) and

phenylsilane (2.5 equiv.) in a glass liner and sealed in a Parr reactor. The Parr reactor was taken out of the glove box and was purged with the CO<sub>2</sub> gas for 2-3 times and then pressurized to 10 bar CO<sub>2</sub>. The reactor was heated at 120 °C for 36 h without any mechanical stirring. After the completion of the reaction, the reactor was cooled to room temperature, and the pressure was released gradually. GC-MS analysis of the crude products was performed, which revealed only 4% yield of the formylated product.

#### 4. Determination of the rate law for UiO-67-CoH catalyzed *N*-formylation of *p*-nitrotoluene.

The kinetic analysis for the *N*-formylation of *p*-nitrotoluene was performed using the initial rate method, with conversions restricted to  $\leq 10\%$ . All reactions were carried out in 3 mL THF in a Parr reactor at 120 °C. For each experiment, a glass liner was charged under an N<sub>2</sub> atmosphere with UiO-67-CoH MOF catalyst, *p*-nitrotoluene, phenylsilane and THF. The liner was then placed inside the Parr reactor, sealed, pressurized with CO<sub>2</sub> to the desired pressure, and heated at 120 °C for 120 minutes. Product formation was quantified by GC-FID using mesitylene as an internal standard. Initial rates were obtained by monitoring the consumption of *p*-nitrotoluene during the first 120 minutes of reaction. Plots of *p*-nitrotoluene concentration versus time were fitted by linear regression, and the slope ( $d[p\text{-nitrotoluene}]/dt$ ) was taken as the initial rate for each experiment. All rates are reported in units of mM·min<sup>-1</sup>. The kinetic dependence of the reaction was examined by measuring the yield of *N*-*p*-tolylformamide across a range of *p*-nitrotoluene (0.7-4.46 mM) concentrations. Furthermore, the influence of catalyst concentration, CO<sub>2</sub> pressure and PhSiH<sub>3</sub> concentration on the *N*-*p*-tolylformamide yield was evaluated through reactions conducted with cobalt concentrations of ( $2.0 \times 10^{-4}$  -  $8.0 \times 10^{-4}$  mM), CO<sub>2</sub> pressure (5-20 bar) and ( $2.5 \times 10^{-1}$  -  $5.0 \times 10^{-1}$  mM) concentrations of PhSiH<sub>3</sub>.

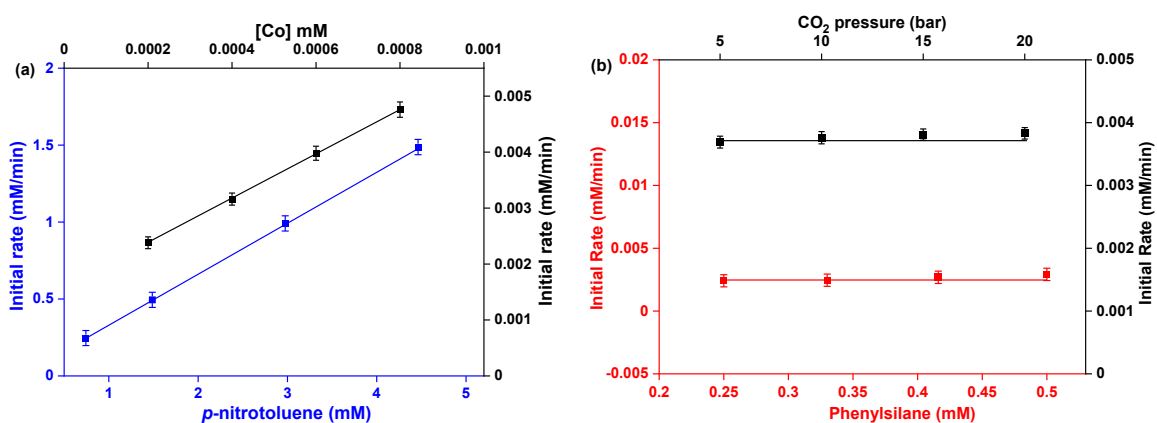

**Figure S9.** (a) Kinetic plots of initial rates ( $d[p\text{-nitrotoluene}]/dt$ ) for the *N*-formylation of *p*-nitrotoluene versus initial concentrations of cobalt and *p*-nitrotoluene. (b) Kinetic plots of initial rates ( $d[p\text{-nitrotoluene}]/dt$ ) for the *N*-formylation of *p*-nitrotoluene versus initial concentrations of PhSiH<sub>3</sub> and initial P<sub>CO<sub>2</sub></sub>.

## 5. EXAFS analysis.

Extended X-ray Absorption Fine Structure (EXAFS) measurements were conducted at the Energy-Scanning EXAFS beamline (BL-9) at the Indus-2 Synchrotron Source, located at the Raja Ramanna Centre for Advanced Technology (RRCAT) in Indore, India.<sup>5</sup> All measurements were conducted at room temperature. The beamline functions within an energy window of 4 keV to 25 keV. The beamline optical setup comprises of a Rh/Pt-coated collimating meridional cylindrical mirror, followed by the monochromatization of the beam by a Si(111) double crystal monochromator (DCM). The second crystal in the DCM, having a sagittal cylindrical geometry, enables horizontal beam focusing, while a Rh/Pt-coated bendable post-mirror, positioned downstream, provides vertical focusing at the sample position. X-ray absorption data were collected in transmission mode using two ionization chambers, each 300 mm in length. The first chamber measures the incident flux intensity, and the second one measures the transmitted flux. Metal foils were used for energy calibration. The gas mixture and pressure were optimized to achieve 10-20% absorption in the first ionization chamber and 70-90% absorption in the second, ensuring a high signal-to-noise ratio. For X-ray absorption measurements, powdered samples were homogeneously mixed with cellulose in an appropriate ratio and pressed into 15 mm pellets under 2 tons of pressure. The sample quantity was adjusted to obtain an optimal edge jump for the element under investigation. Spectra were recorded at the Co K-edge in transmission mode and calibrated against a reference metallic Co foil (7709 eV). Data reduction and analysis were performed using the Demeter software package.<sup>6</sup>

### 5.1 XANES analysis.

The oxidation state of the Co species within UiO-67-CoCl and UiO-67-CoH was determined by comparing its pre-edge and K-edge energy positions to that of CoCl<sub>2</sub>. The pre-edge positions of UiO-67-CoCl (7709.10 eV) and UiO-67-CoH (7709.15 eV) closely matched to that of CoCl<sub>2</sub> (7709.4 eV). These results confirm the existence of Co in +2 oxidation state in UiO-67-CoCl and UiO-CoH.

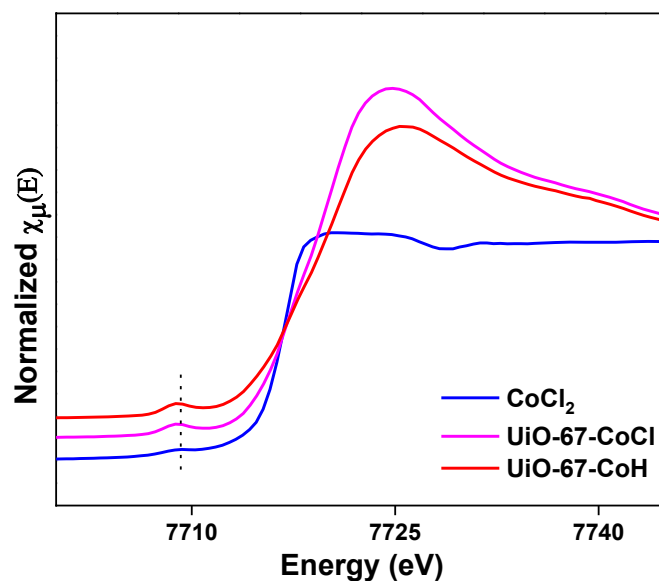

**Figure S10.**  $\mu(E)$  XAS spectra of  $\text{CoCl}_2$  (blue), UiO-67-CoH (magenta) and UiO-67-CoH (red).

## 5.2 EXAFS fitting using DFT optimized structures.

The spectra were calibrated using reference spectra and aligned to the first peak in the smoothed first derivative of the absorption spectrum. Background noise was eliminated, and the data were processed to achieve a normalized unit edge step. The fitting parameters for the Co- $K$ -edge of UiO-67-CoH are detailed in Table S6 respectively.

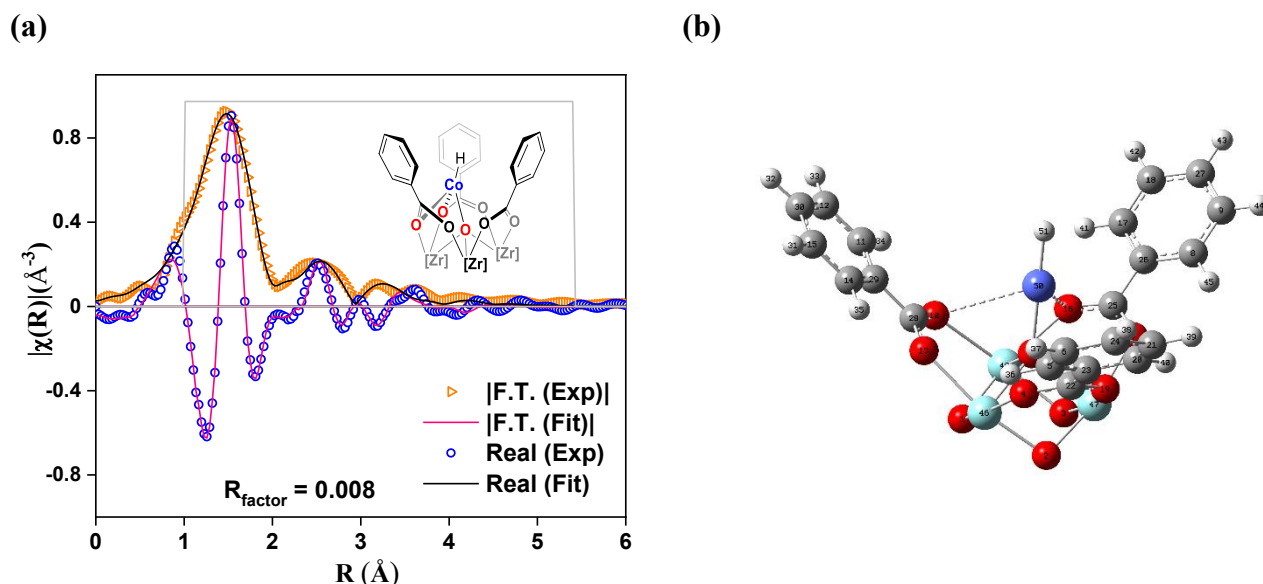

**Figure S11.** (a) EXAFS spectrum (hollow orange triangle and circle) and fits (pink and black solid lines) of UiO-67-CoH in the  $R$  space from 1.0-5.4 Å. (b) DFT optimized structure of UiO-67-CoH.

**Table S5. Summary of EXAFS fitting parameters of UiO-67-CoH.**

| Sample             | UiO-67-CoH                                                 |
|--------------------|------------------------------------------------------------|
| Fitting range      | $k$ 2.81-10.62 $\text{\AA}^{-1}$<br>R 1.0-5.4 $\text{\AA}$ |
| Independent points | 22                                                         |
| R-factor           | 0.008                                                      |
| $S_0^2$            | 1.0                                                        |
| Variables          | 14                                                         |
| Reduced chi-square | 63.1                                                       |
| $\Delta E_0$ (eV)  | -3.61 $\pm$ 2.68                                           |
| R(Co-O6)           | 1.94 $\pm$ 0.52                                            |
| R(Co-O7)           | 1.95 $\pm$ 0.29                                            |
| R(Co-C25)          | 2.08 $\pm$ 0.08                                            |
| R(Co-O22)          | 2.98 $\pm$ 0.06                                            |
| R(Co-Zr1)          | 3.07 $\pm$ 0.15                                            |
| R(Co-C26)          | 3.53 $\pm$ 0.12                                            |
| R(Co-O10)          | 3.33 $\pm$ 0.06                                            |
| R(Co-C28)          | 3.34 $\pm$ 0.06                                            |
| R(Co-C8)           | 3.95 $\pm$ 0.12                                            |
| R(Co-Zr2)          | 3.62 $\pm$ 0.08                                            |
| R(Co-C23)          | 4.43 $\pm$ 0.12                                            |
| R(Co-H)            | 1.44 $\pm$ 0.11                                            |
| $\sigma^2$ (Co-O)  | 0.008 $\pm$ 0.002                                          |
| $\sigma^2$ (Co-C)  | 0.006 $\pm$ 0.005                                          |
| $\sigma^2$ (Co-Zr) | 0.015 $\pm$ 0.007                                          |
| $\sigma^2$ (Co-H)  | 0.004 $\pm$ 0.018                                          |

## 6. DFT calculations.

All quantum chemical calculations were performed using the density functional theory (DFT) functional B3LYP-GD3BJ/def2svp implemented in the Gaussian 16 program.<sup>7-11</sup> Geometry optimizations of the electronic structures were optimized at the unrestricted level, and dispersion interactions were included via the Becke-Johnson (BJ) damping scheme (GD3BJ).<sup>12</sup> All computations were conducted in solution at 393.15 K using the polarizable continuum model (PCM) with the integral equation formalism variant (IEFPCM), as the default SCRF method by using tetrahydrofuran (THF) as the solvent. After geometry optimization, frequency calculations were performed at the same theoretical level to confirm the identity of each stationary step. Stable intermediates showed no imaginary frequencies, while transition states exhibited one imaginary mode associated with the specific bond-forming or bond-cleavage event occurring in that step of the reaction pathway. The DFT results indicate that the quartet spin state ( $S = 3/2$ ) is the most stable configuration for Co(II) in all cases, as shown in Tables S6 and S7.

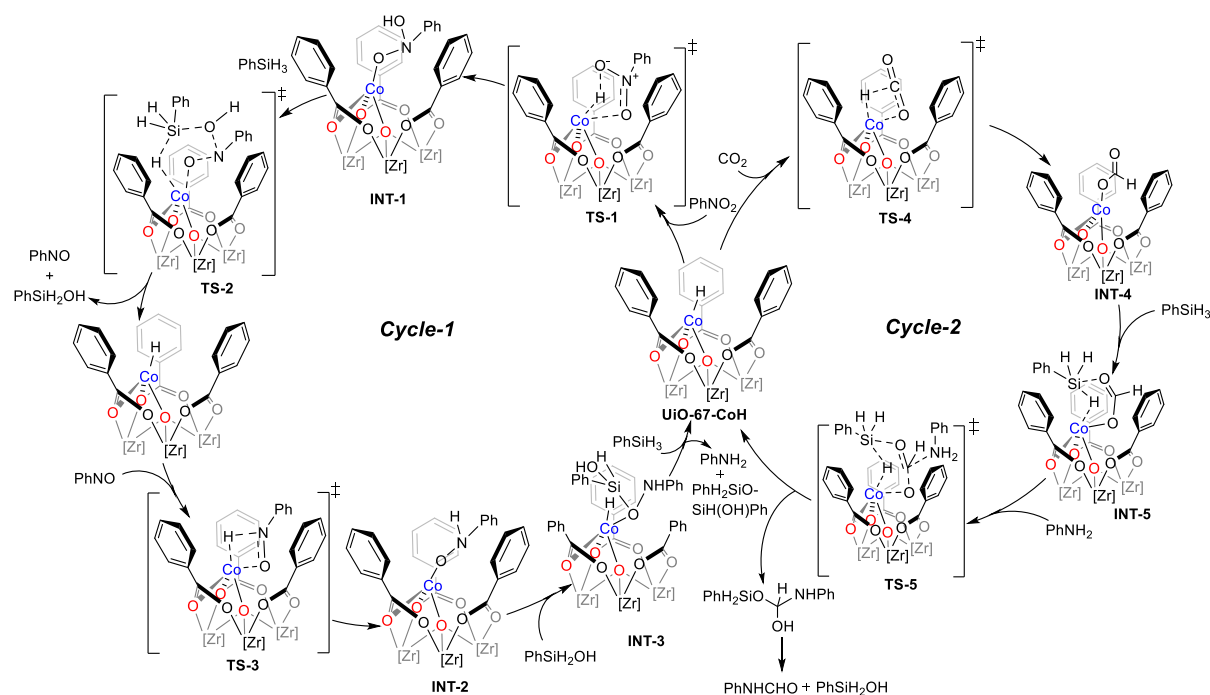

**Figure S12.** Proposed catalytic cycle of UiO-67-CoH catalyzed *N*-formylation reaction.

**Table S6.** Relative energies of the structures in the most stable spin state. All the structures are being geometry optimized for the catalytic cycle.

| <b>Structure</b> | <b>O.S.</b> | <b>Quatret (S = 3/2)</b> |
|------------------|-------------|--------------------------|
| UiO-67-CoH       | Co(II)      | 0                        |
| TS-1             | Co(II)      | 25.719035                |
| INT-1            | Co(II)      | -14.45007                |
| TS-2             | Co(II)      | -8.6333675               |
| UiO-67-CoH       | Co(II)      | -33.863665               |
| TS-3             | Co(II)      | -22.455705               |
| INT-2            | Co(II)      | -72.18007                |
| INT-3            | Co(II)      | -68.0391975              |
| UiO-67-CoH       | Co(II)      | -144.065215              |

**Table S7.** Relative energies of the structures in the most stable spin state. All the structures are being geometry optimized for the catalytic cycle.

| <b>Structure</b> | <b>O.S.</b> | <b>Quatret (S = 3/2)</b> |
|------------------|-------------|--------------------------|
| UiO-67-CoH       | Co(II)      | 0                        |
| TS-4             | Co(II)      | 11.91748                 |
| INT-4            | Co(II)      | -9.56623775              |
| INT-5            | Co(II)      | -17.696755               |
| TS-5             | Co(II)      | -12.42199                |
| UiO-67-CoH       | Co(II)      | -20.1805625              |

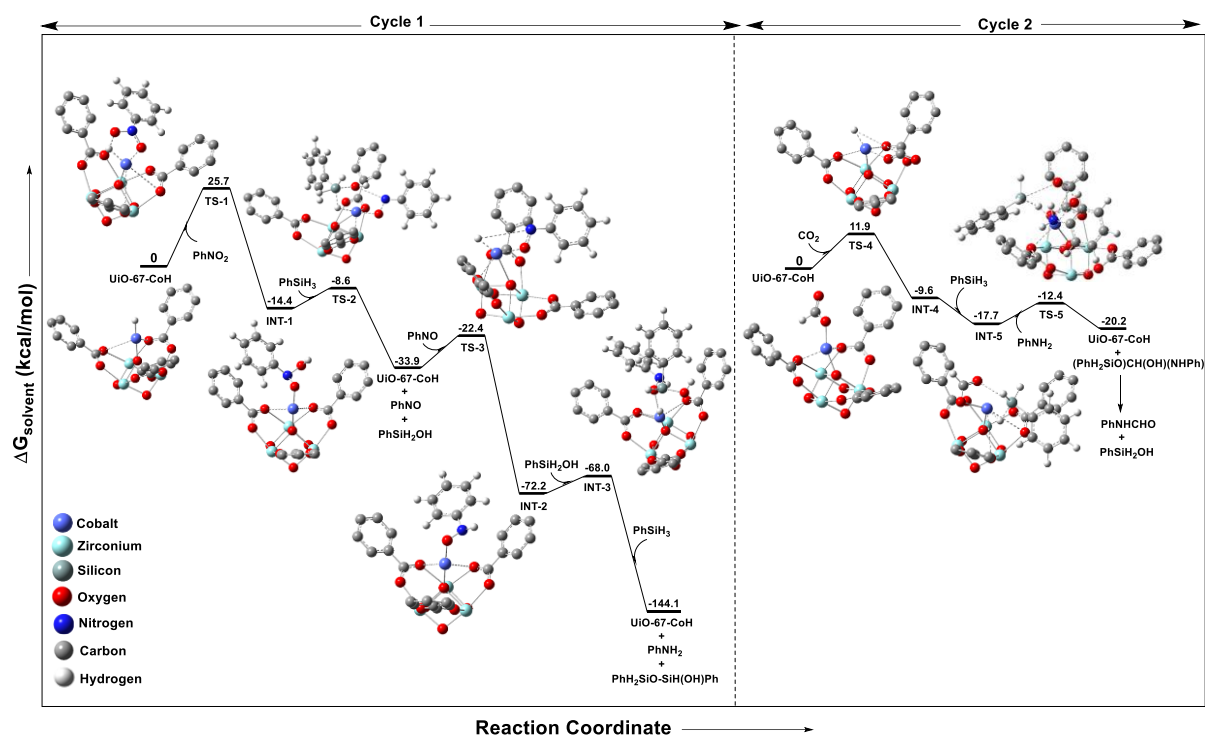

**Figure S13.** DFT-calculated free energy diagram for UiO-67-CoH catalyzed *N*-formylation reaction of nitro substrates at 393 K.

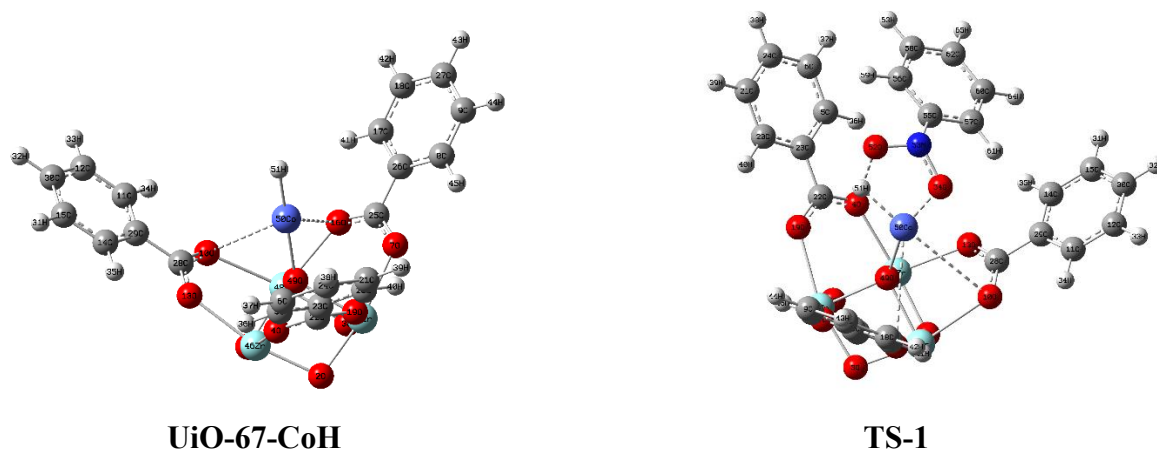

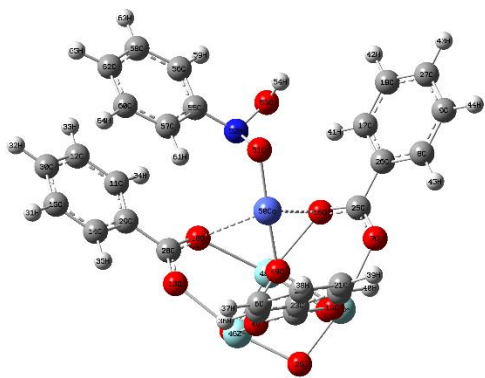

**INT-1**

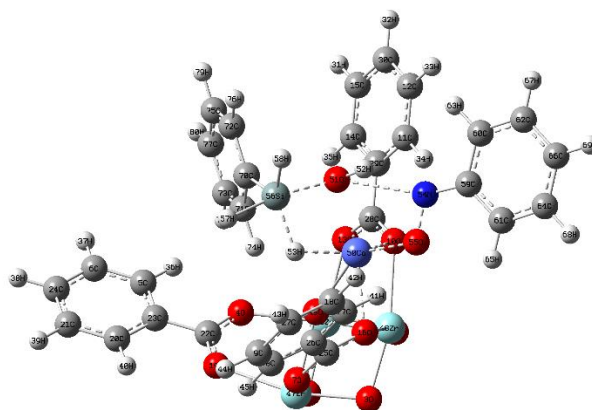

**TS-2**

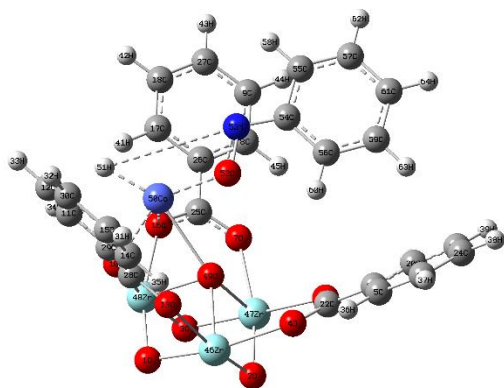

**TS-3**

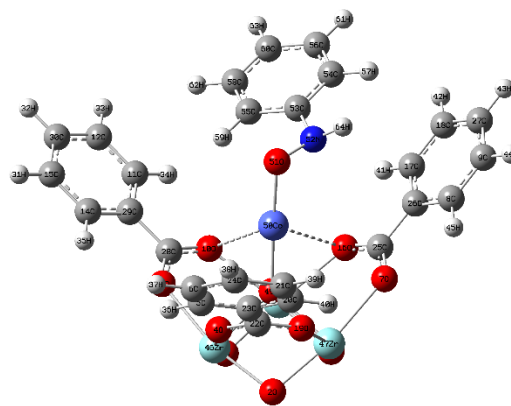

**INT-2**

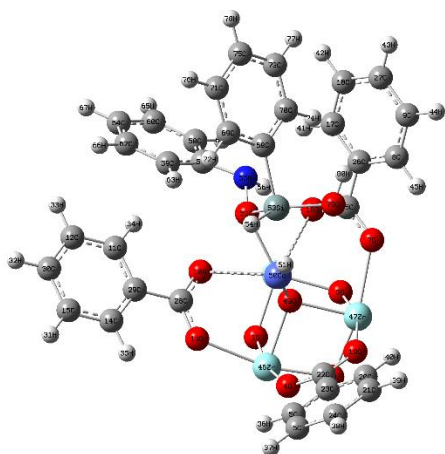

**INT-3**

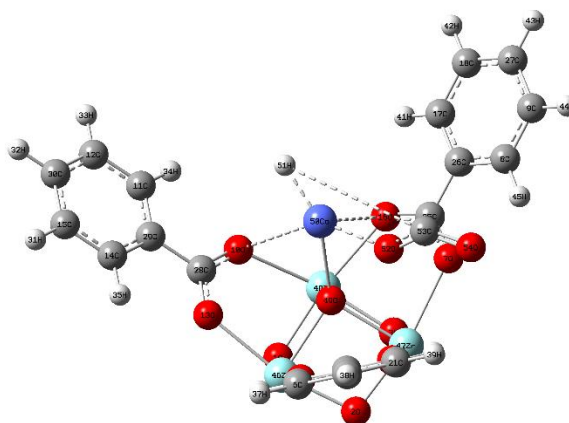

**TS-4**

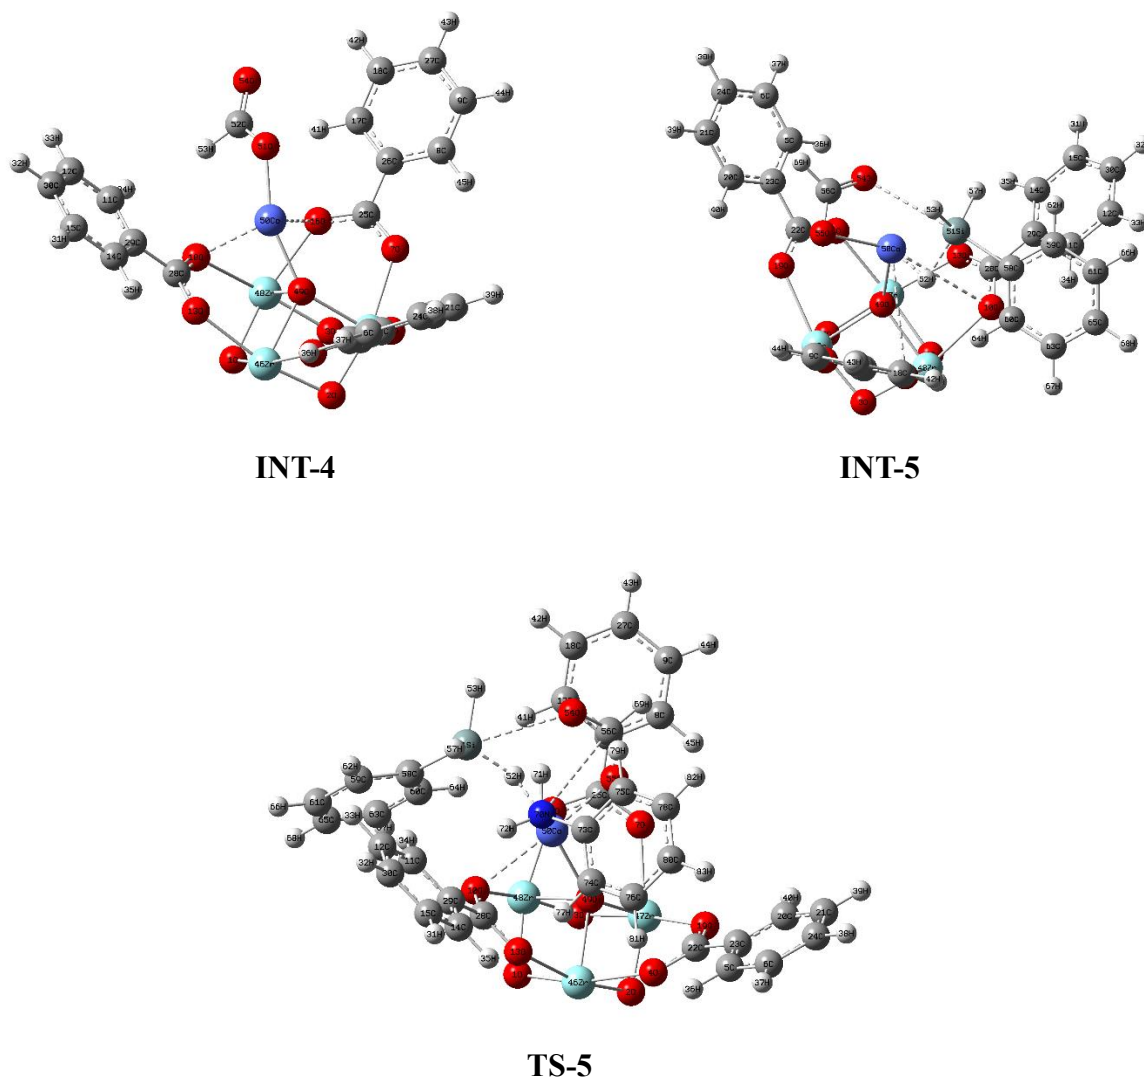

**Figure S14.** DFT-optimized structures of different intermediates and transition states of the catalytic cycle in UiO-67-CoH catalysed *N*-formylation reaction of nitro substrates.

## 6.1. Cartesian Coordinates of Optimized Structures

### Cartesian coordinates of UiO-67-CoH

-----  
Coordinates (Angstroms)

Atom No. Atoms X Y Z  
-----

|    |   |           |           |           |
|----|---|-----------|-----------|-----------|
| 1  | O | 49.515962 | 33.903564 | 47.564920 |
| 2  | O | 47.382028 | 31.936296 | 47.505497 |
| 3  | O | 47.520934 | 33.865141 | 49.605120 |
| 4  | O | 46.457830 | 32.610732 | 44.881943 |
| 5  | C | 44.646135 | 32.084006 | 42.816299 |
| 6  | C | 43.710048 | 31.832707 | 41.810162 |
| 7  | O | 44.951276 | 34.995435 | 49.351309 |
| 8  | C | 43.043038 | 36.913563 | 50.080253 |
| 9  | C | 42.119007 | 37.904328 | 50.421102 |
| 10 | O | 49.159162 | 36.530451 | 46.550771 |
| 11 | C | 49.902754 | 38.475899 | 44.672023 |
| 12 | C | 50.274012 | 39.412362 | 43.704249 |
| 13 | O | 48.999750 | 34.953012 | 44.953336 |
| 14 | C | 49.760135 | 36.764455 | 42.962378 |
| 15 | C | 50.132169 | 37.700164 | 41.994012 |
| 16 | O | 46.603334 | 36.521488 | 49.394486 |
| 17 | C | 44.823272 | 38.556928 | 50.126622 |
| 18 | C | 43.899921 | 39.548285 | 50.467483 |
| 19 | O | 44.824281 | 32.543561 | 46.428606 |
| 20 | C | 42.877510 | 32.045237 | 44.472430 |
| 21 | C | 41.940727 | 31.794888 | 43.466888 |
| 22 | C | 45.247061 | 32.464161 | 45.243395 |
| 23 | C | 44.238225 | 32.191182 | 44.156084 |
| 24 | C | 42.355415 | 31.687269 | 42.133630 |
| 25 | C | 45.396521 | 36.166304 | 49.537645 |
| 26 | C | 44.403148 | 37.230955 | 49.930586 |
| 27 | C | 42.545739 | 39.223837 | 50.615343 |
| 28 | C | 49.241664 | 36.134965 | 45.356335 |
| 29 | C | 49.643459 | 37.143852 | 44.309742 |
| 30 | C | 50.390296 | 39.026003 | 42.363229 |
| 31 | H | 50.221459 | 37.396285 | 40.947856 |
| 32 | H | 50.681734 | 39.758363 | 41.605803 |

|    |    |           |           |           |
|----|----|-----------|-----------|-----------|
| 33 | H  | 50.473797 | 40.447002 | 43.994659 |
| 34 | H  | 49.807963 | 38.762980 | 45.720594 |
| 35 | H  | 49.555133 | 35.728274 | 42.688482 |
| 36 | H  | 45.704624 | 32.200722 | 42.578185 |
| 37 | H  | 44.036123 | 31.749957 | 40.770172 |
| 38 | H  | 41.622715 | 31.490482 | 41.346603 |
| 39 | H  | 40.883692 | 31.683034 | 43.721660 |
| 40 | H  | 42.568542 | 32.131964 | 45.515457 |
| 41 | H  | 45.880677 | 38.796826 | 50.003894 |
| 42 | H  | 44.235201 | 40.577859 | 50.616824 |
| 43 | H  | 41.822696 | 39.999645 | 50.880539 |
| 44 | H  | 41.062252 | 37.648960 | 50.534195 |
| 45 | H  | 42.723429 | 35.882337 | 49.921658 |
| 46 | Zr | 48.257344 | 33.168904 | 46.189154 |
| 47 | Zr | 46.084256 | 33.179326 | 48.390372 |
| 48 | Zr | 48.356893 | 35.274456 | 48.453476 |
| 49 | O  | 46.901572 | 34.614487 | 47.047243 |
| 50 | Co | 46.261354 | 36.373527 | 46.671307 |
| 51 | H  | 45.211669 | 36.948948 | 45.835453 |

### Cartesian coordinates of TS-1

-----  
Coordinates (Angstroms)

Atom No. Atoms X Y Z  
-----

|    |   |           |           |           |
|----|---|-----------|-----------|-----------|
| 1  | O | 49.504477 | 33.995353 | 47.623615 |
| 2  | O | 47.370544 | 32.028084 | 47.564191 |
| 3  | O | 47.509449 | 33.956929 | 49.663814 |
| 4  | O | 46.446345 | 32.702520 | 44.940637 |
| 5  | C | 44.634650 | 32.175794 | 42.874993 |
| 6  | C | 43.698563 | 31.924495 | 41.868856 |
| 7  | O | 44.939791 | 35.087224 | 49.410003 |
| 8  | C | 43.031553 | 37.005352 | 50.138948 |
| 9  | C | 42.107522 | 37.996117 | 50.479796 |
| 10 | O | 49.147677 | 36.622239 | 46.609465 |
| 11 | C | 49.891269 | 38.567687 | 44.730717 |
| 12 | C | 50.262527 | 39.504150 | 43.762944 |

|    |    |           |           |           |
|----|----|-----------|-----------|-----------|
| 13 | O  | 48.988265 | 35.044801 | 45.012031 |
| 14 | C  | 49.748651 | 36.856244 | 43.021072 |
| 15 | C  | 50.120684 | 37.791953 | 42.052707 |
| 16 | O  | 46.591850 | 36.613276 | 49.453180 |
| 17 | C  | 44.811788 | 38.648717 | 50.185317 |
| 18 | C  | 43.888437 | 39.640074 | 50.526178 |
| 19 | O  | 44.812797 | 32.635350 | 46.487301 |
| 20 | C  | 42.866025 | 32.137025 | 44.531124 |
| 21 | C  | 41.929243 | 31.886676 | 43.525583 |
| 22 | C  | 45.235576 | 32.555950 | 45.302089 |
| 23 | C  | 44.226741 | 32.282971 | 44.214778 |
| 24 | C  | 42.343930 | 31.779057 | 42.192324 |
| 25 | C  | 45.385037 | 36.258092 | 49.596339 |
| 26 | C  | 44.391663 | 37.322744 | 49.989281 |
| 27 | C  | 42.534255 | 39.315626 | 50.674037 |
| 28 | C  | 49.230179 | 36.226753 | 45.415030 |
| 29 | C  | 49.631974 | 37.235641 | 44.368437 |
| 30 | C  | 50.378811 | 39.117792 | 42.421923 |
| 31 | H  | 50.209974 | 37.488073 | 41.006550 |
| 32 | H  | 50.670249 | 39.850152 | 41.664497 |
| 33 | H  | 50.462312 | 40.538791 | 44.053354 |
| 34 | H  | 49.796478 | 38.854768 | 45.779288 |
| 35 | H  | 49.543648 | 35.820062 | 42.747176 |
| 36 | H  | 45.693139 | 32.292510 | 42.636879 |
| 37 | H  | 44.024638 | 31.841746 | 40.828866 |
| 38 | H  | 41.611231 | 31.582270 | 41.405297 |
| 39 | H  | 40.872207 | 31.774822 | 43.780355 |
| 40 | H  | 42.557057 | 32.223752 | 45.574152 |
| 41 | H  | 45.869192 | 38.888614 | 50.062588 |
| 42 | H  | 44.223717 | 40.669648 | 50.675518 |
| 43 | H  | 41.811211 | 40.091433 | 50.939234 |
| 44 | H  | 41.050767 | 37.740748 | 50.592889 |
| 45 | H  | 42.711944 | 35.974125 | 49.980352 |
| 46 | Zr | 48.245859 | 33.260693 | 46.247848 |
| 47 | Zr | 46.072771 | 33.271115 | 48.449067 |
| 48 | Zr | 48.345408 | 35.366244 | 48.512170 |
| 49 | O  | 46.890087 | 34.706276 | 47.105937 |
| 50 | Co | 46.249869 | 36.465315 | 46.730001 |
| 51 | H  | 44.730335 | 36.631591 | 46.664653 |

|    |   |           |           |           |
|----|---|-----------|-----------|-----------|
| 52 | O | 44.093156 | 38.098992 | 46.553597 |
| 53 | N | 45.325253 | 38.992105 | 46.524001 |
| 54 | O | 46.537396 | 37.971249 | 46.663352 |
| 55 | C | 45.381915 | 40.455469 | 46.396497 |
| 56 | C | 44.630750 | 41.099540 | 45.412935 |
| 57 | C | 46.186527 | 41.200119 | 47.258844 |
| 58 | C | 44.684767 | 42.487895 | 45.291384 |
| 59 | H | 43.997101 | 40.512121 | 44.732736 |
| 60 | C | 46.239911 | 42.588991 | 47.138025 |
| 61 | H | 46.778490 | 40.692667 | 48.034215 |
| 62 | C | 45.489320 | 43.232935 | 46.154417 |
| 63 | H | 44.093203 | 42.995576 | 44.515749 |
| 64 | H | 46.874084 | 43.175891 | 47.818354 |
| 65 | H | 45.531705 | 44.327598 | 46.058425 |

---

### Cartesian coordinates of INT-1

---

Coordinates (Angstroms)

| Atom No. | Atoms | X         | Y         | Z         |
|----------|-------|-----------|-----------|-----------|
| 1        | O     | 50.105788 | 35.041714 | 46.747842 |
| 2        | O     | 48.612068 | 32.694709 | 47.576974 |
| 3        | O     | 48.740457 | 35.001460 | 49.253470 |
| 4        | O     | 46.941980 | 32.595798 | 45.254636 |
| 5        | C     | 44.890776 | 31.276143 | 43.884384 |
| 6        | C     | 43.840147 | 30.626907 | 43.231395 |
| 7        | O     | 45.981398 | 35.477262 | 49.579700 |
| 8        | C     | 43.870129 | 37.050787 | 50.538057 |
| 9        | C     | 42.828630 | 37.869336 | 50.981774 |
| 10       | O     | 48.720580 | 37.229196 | 45.561395 |
| 11       | C     | 48.575595 | 38.888098 | 43.242275 |
| 12       | C     | 48.445143 | 39.660492 | 42.085654 |
| 13       | O     | 48.721851 | 35.390636 | 44.267739 |
| 14       | C     | 48.480347 | 36.869040 | 41.905637 |
| 15       | C     | 48.350675 | 37.640758 | 40.748344 |
| 16       | O     | 47.099405 | 37.265669 | 48.836805 |
| 17       | C     | 45.114938 | 39.010214 | 49.842979 |
| 18       | C     | 44.073923 | 39.829476 | 50.286431 |
| 19       | O     | 45.803703 | 32.502952 | 47.193932 |

|    |    |           |           |           |
|----|----|-----------|-----------|-----------|
| 20 | C  | 43.645023 | 31.204252 | 45.961700 |
| 21 | C  | 42.593638 | 30.555897 | 45.309337 |
| 22 | C  | 45.935296 | 32.271635 | 45.961497 |
| 23 | C  | 44.802865 | 31.569272 | 45.255240 |
| 24 | C  | 42.689567 | 30.265153 | 43.942812 |
| 25 | C  | 46.135636 | 36.728948 | 49.463150 |
| 26 | C  | 45.022483 | 37.613926 | 49.965354 |
| 27 | C  | 42.928518 | 39.260494 | 50.856733 |
| 28 | C  | 48.734994 | 36.653963 | 44.412794 |
| 29 | C  | 48.595143 | 37.485935 | 43.162299 |
| 30 | C  | 48.333277 | 39.038182 | 40.836116 |
| 31 | H  | 48.262721 | 37.152615 | 39.774311 |
| 32 | H  | 48.232143 | 39.642347 | 39.930722 |
| 33 | H  | 48.430574 | 40.751117 | 42.156783 |
| 34 | H  | 48.663386 | 39.359531 | 44.222553 |
| 35 | H  | 48.494405 | 35.779257 | 41.851868 |
| 36 | H  | 45.792528 | 31.564785 | 43.341938 |
| 37 | H  | 43.917095 | 30.401817 | 42.164547 |
| 38 | H  | 41.867356 | 29.756999 | 43.432190 |
| 39 | H  | 41.695967 | 30.275666 | 45.866474 |
| 40 | H  | 43.583753 | 31.437433 | 47.026012 |
| 41 | H  | 46.011098 | 39.440155 | 49.392684 |
| 42 | H  | 44.153492 | 40.914990 | 50.186104 |
| 43 | H  | 42.113051 | 39.901205 | 51.202423 |
| 44 | H  | 41.934819 | 37.422766 | 51.424955 |
| 45 | H  | 43.803423 | 35.965130 | 50.625402 |
| 46 | Zr | 48.791286 | 33.785037 | 45.904620 |
| 47 | Zr | 47.285915 | 33.787143 | 48.606669 |
| 48 | Zr | 48.876380 | 36.286677 | 47.723448 |
| 49 | O  | 47.351707 | 35.052993 | 46.895475 |
| 50 | Co | 46.113019 | 36.428769 | 46.237468 |
| 51 | O  | 44.911150 | 37.763651 | 45.599019 |
| 52 | N  | 45.830400 | 38.818529 | 45.560192 |
| 53 | O  | 45.689791 | 39.602555 | 46.777160 |
| 54 | H  | 44.706533 | 39.737518 | 46.850990 |
| 55 | C  | 45.550359 | 39.675767 | 44.452828 |
| 56 | C  | 46.078024 | 40.971536 | 44.438879 |
| 57 | C  | 44.786776 | 39.218726 | 43.367486 |
| 58 | C  | 45.840465 | 41.808469 | 43.348153 |

|    |   |           |           |           |
|----|---|-----------|-----------|-----------|
| 59 | H | 46.666530 | 41.301078 | 45.294077 |
| 60 | C | 44.562495 | 40.058324 | 42.276624 |
| 61 | H | 44.408407 | 38.200095 | 43.400055 |
| 62 | C | 45.086476 | 41.357657 | 42.258930 |
| 63 | H | 46.262289 | 42.816362 | 43.342735 |
| 64 | H | 43.966652 | 39.697694 | 41.434536 |
| 65 | H | 44.909945 | 42.012212 | 41.402987 |

-----

### Cartesian coordinates of TS-2

-----

Coordinates (Angstroms)

| Atom No. | Atoms | X         | Y         | Z         |
|----------|-------|-----------|-----------|-----------|
| 1        | O     | 50.210625 | 35.371821 | 48.578144 |
| 2        | O     | 48.076670 | 33.404528 | 48.518732 |
| 3        | O     | 48.215511 | 35.333431 | 50.618380 |
| 4        | O     | 47.152457 | 34.078948 | 45.895182 |
| 5        | C     | 45.340768 | 33.552235 | 43.829525 |
| 6        | C     | 44.404680 | 33.300936 | 42.823388 |
| 7        | O     | 45.645893 | 36.463662 | 50.364523 |
| 8        | C     | 43.737663 | 38.381791 | 51.093469 |
| 9        | C     | 42.813639 | 39.372559 | 51.434330 |
| 10       | O     | 49.836304 | 37.997793 | 47.564924 |
| 11       | C     | 50.597387 | 39.944129 | 45.685250 |
| 12       | C     | 50.968646 | 40.880592 | 44.717476 |
| 13       | O     | 49.694418 | 36.421222 | 45.966552 |
| 14       | C     | 50.454769 | 38.232685 | 43.975604 |
| 15       | C     | 50.826803 | 39.168394 | 43.007239 |
| 16       | O     | 47.298235 | 37.989359 | 50.407628 |
| 17       | C     | 45.517905 | 40.025159 | 51.139850 |
| 18       | C     | 44.594554 | 41.016516 | 51.480711 |
| 19       | O     | 45.518911 | 34.011793 | 47.441834 |
| 20       | C     | 43.572142 | 33.513466 | 45.485657 |
| 21       | C     | 42.635359 | 33.263116 | 44.480115 |
| 22       | C     | 45.941694 | 33.932390 | 46.256622 |
| 23       | C     | 44.932858 | 33.659411 | 45.169310 |
| 24       | C     | 43.050047 | 33.155498 | 43.146856 |
| 25       | C     | 46.091041 | 37.634959 | 50.550979 |
| 26       | C     | 45.097777 | 38.699190 | 50.943793 |

|    |    |           |           |           |
|----|----|-----------|-----------|-----------|
| 27 | C  | 43.240372 | 40.692068 | 51.628571 |
| 28 | C  | 49.936188 | 37.603263 | 46.369530 |
| 29 | C  | 50.338103 | 38.612080 | 45.322971 |
| 30 | C  | 51.084930 | 40.494233 | 43.376455 |
| 31 | H  | 50.916092 | 38.864515 | 41.961081 |
| 32 | H  | 51.376368 | 41.226594 | 42.619029 |
| 33 | H  | 51.168430 | 41.915233 | 45.007886 |
| 34 | H  | 50.502596 | 40.231210 | 46.733821 |
| 35 | H  | 50.249766 | 37.196504 | 43.701708 |
| 36 | H  | 46.399257 | 33.668951 | 43.591411 |
| 37 | H  | 44.730756 | 33.218186 | 41.783397 |
| 38 | H  | 42.317347 | 32.958710 | 42.359829 |
| 39 | H  | 41.578324 | 33.151263 | 44.734887 |
| 40 | H  | 43.263174 | 33.600193 | 46.528684 |
| 41 | H  | 46.575310 | 40.265056 | 51.017121 |
| 42 | H  | 44.929834 | 42.046090 | 51.630052 |
| 43 | H  | 42.517328 | 41.467875 | 51.893767 |
| 44 | H  | 41.756884 | 39.117190 | 51.547423 |
| 45 | H  | 43.418061 | 37.350567 | 50.934886 |
| 46 | Zr | 48.952043 | 34.637127 | 47.202495 |
| 47 | Zr | 46.779030 | 34.647545 | 49.403674 |
| 48 | Zr | 49.051448 | 36.742385 | 49.466655 |
| 49 | O  | 47.610976 | 36.283054 | 48.077659 |
| 50 | Co | 47.845313 | 38.921799 | 48.412703 |
| 51 | O  | 47.730927 | 40.115070 | 46.749335 |
| 52 | H  | 48.079994 | 40.917454 | 47.197263 |
| 53 | H  | 46.088385 | 38.939908 | 47.966195 |
| 54 | N  | 48.971579 | 41.403564 | 48.838971 |
| 55 | O  | 48.639248 | 40.349623 | 49.558980 |
| 56 | Si | 45.910647 | 39.811983 | 46.648248 |
| 57 | H  | 44.390542 | 39.454093 | 46.801161 |
| 58 | H  | 45.634505 | 41.298284 | 46.584887 |
| 59 | C  | 49.651420 | 42.379142 | 49.532801 |
| 60 | C  | 50.049714 | 43.532652 | 48.808219 |
| 61 | C  | 49.974581 | 42.303795 | 50.913306 |
| 62 | C  | 50.742575 | 44.561516 | 49.436082 |
| 63 | H  | 49.796105 | 43.586688 | 47.746567 |
| 64 | C  | 50.668867 | 43.343234 | 51.527815 |
| 65 | H  | 49.663380 | 41.421556 | 51.472021 |

|    |   |           |           |           |
|----|---|-----------|-----------|-----------|
| 66 | C | 51.059976 | 44.478037 | 50.802057 |
| 67 | H | 51.041268 | 45.442113 | 48.860673 |
| 68 | H | 50.910213 | 43.273226 | 52.592686 |
| 69 | H | 51.603687 | 45.288238 | 51.293479 |
| 70 | C | 46.200840 | 38.856413 | 45.031099 |
| 71 | C | 46.527428 | 37.488429 | 45.058549 |
| 72 | C | 46.204542 | 39.500958 | 43.780350 |
| 73 | C | 46.859191 | 36.796738 | 43.890056 |
| 74 | H | 46.557776 | 36.958092 | 46.013277 |
| 75 | C | 46.520347 | 38.811339 | 42.604932 |
| 76 | H | 45.972722 | 40.568999 | 43.718542 |
| 77 | C | 46.854753 | 37.454077 | 42.656747 |
| 78 | H | 47.132360 | 35.743487 | 43.955016 |
| 79 | H | 46.517789 | 39.338411 | 41.646429 |
| 80 | H | 47.115819 | 36.914740 | 41.742075 |

-----

### Cartesian coordinates of TS-3

-----

Coordinates (Angstroms)

| Atom No. | Atoms | X         | Y         | Z         |
|----------|-------|-----------|-----------|-----------|
| 1        | O     | 49.961123 | 35.080503 | 46.685418 |
| 2        | O     | 48.467390 | 32.733461 | 47.514579 |
| 3        | O     | 48.595795 | 35.040202 | 49.191068 |
| 4        | O     | 46.797310 | 32.634531 | 45.192278 |
| 5        | C     | 44.746103 | 31.314899 | 43.821991 |
| 6        | C     | 43.695474 | 30.665663 | 43.169003 |
| 7        | O     | 45.836762 | 35.516038 | 49.517322 |
| 8        | C     | 43.725456 | 37.089543 | 50.475664 |
| 9        | C     | 42.683957 | 37.908092 | 50.919382 |
| 10       | O     | 48.576213 | 37.267879 | 45.498608 |
| 11       | C     | 48.430922 | 38.926854 | 43.179882 |
| 12       | C     | 48.300470 | 39.699248 | 42.023262 |
| 13       | O     | 48.577066 | 35.429370 | 44.205324 |
| 14       | C     | 48.335674 | 36.907796 | 41.843245 |
| 15       | C     | 48.206001 | 37.679514 | 40.685952 |
| 16       | O     | 46.954569 | 37.304373 | 48.774304 |
| 17       | C     | 44.970265 | 39.048969 | 49.780587 |
| 18       | C     | 43.929250 | 39.868232 | 50.224038 |

|    |    |           |           |           |
|----|----|-----------|-----------|-----------|
| 19 | O  | 45.658999 | 32.541728 | 47.131554 |
| 20 | C  | 43.500350 | 31.243008 | 45.899307 |
| 21 | C  | 42.448965 | 30.594653 | 45.246945 |
| 22 | C  | 45.790623 | 32.310391 | 45.899105 |
| 23 | C  | 44.658192 | 31.608028 | 45.192848 |
| 24 | C  | 42.544894 | 30.303909 | 43.880419 |
| 25 | C  | 45.990991 | 36.767645 | 49.400750 |
| 26 | C  | 44.877818 | 37.652684 | 49.902976 |
| 27 | C  | 42.783844 | 39.299250 | 50.794340 |
| 28 | C  | 48.590308 | 36.693000 | 44.350261 |
| 29 | C  | 48.450518 | 37.524696 | 43.099905 |
| 30 | C  | 48.188604 | 39.076938 | 40.773723 |
| 31 | H  | 48.118048 | 37.191371 | 39.711919 |
| 32 | H  | 48.087469 | 39.681103 | 39.868329 |
| 33 | H  | 48.285900 | 40.789873 | 42.094391 |
| 34 | H  | 48.518713 | 39.398287 | 44.160161 |
| 35 | H  | 48.349731 | 35.818013 | 41.789475 |
| 36 | H  | 45.647855 | 31.603541 | 43.279545 |
| 37 | H  | 43.772422 | 30.440572 | 42.102154 |
| 38 | H  | 41.722683 | 29.795754 | 43.369797 |
| 39 | H  | 41.551294 | 30.314422 | 45.804082 |
| 40 | H  | 43.439080 | 31.476189 | 46.963620 |
| 41 | H  | 45.866425 | 39.478911 | 49.330291 |
| 42 | H  | 44.008818 | 40.953746 | 50.123711 |
| 43 | H  | 41.968378 | 39.939961 | 51.140030 |
| 44 | H  | 41.790146 | 37.461522 | 51.362563 |
| 45 | H  | 43.658749 | 36.003886 | 50.563009 |
| 46 | Zr | 48.646916 | 33.824091 | 45.842288 |
| 47 | Zr | 47.140983 | 33.825713 | 48.544129 |
| 48 | Zr | 48.731764 | 36.325263 | 47.660901 |
| 49 | O  | 47.176257 | 35.237215 | 46.816356 |
| 50 | Co | 46.672291 | 37.637742 | 46.525856 |
| 51 | H  | 46.861175 | 39.281796 | 46.645997 |
| 52 | O  | 45.033615 | 36.549363 | 46.611657 |
| 53 | N  | 43.939068 | 37.249263 | 46.785581 |
| 54 | C  | 42.823245 | 36.484142 | 47.025130 |
| 55 | C  | 41.611713 | 37.156388 | 47.330060 |
| 56 | C  | 42.816127 | 35.060111 | 46.999136 |
| 57 | C  | 40.453198 | 36.441196 | 47.611913 |

|    |   |           |           |           |
|----|---|-----------|-----------|-----------|
| 58 | H | 41.625969 | 38.248067 | 47.350225 |
| 59 | C | 41.646620 | 34.359391 | 47.279043 |
| 60 | H | 43.741020 | 34.539213 | 46.749576 |
| 61 | C | 40.456701 | 35.035815 | 47.592272 |
| 62 | H | 39.531488 | 36.979102 | 47.851913 |
| 63 | H | 41.655533 | 33.265254 | 47.246449 |
| 64 | H | 39.543939 | 34.477389 | 47.813774 |

---

### Cartesian coordinates of INT-2

---

Coordinates (Angstroms)

| Atom No. | Atoms | X         | Y         | Z         |
|----------|-------|-----------|-----------|-----------|
| 1        | O     | 50.105775 | 35.041738 | 46.747795 |
| 2        | O     | 48.612133 | 32.694754 | 47.577010 |
| 3        | O     | 48.740260 | 35.001549 | 49.253527 |
| 4        | O     | 46.941986 | 32.595757 | 45.254696 |
| 5        | C     | 44.890776 | 31.276143 | 43.884384 |
| 6        | C     | 43.840147 | 30.626907 | 43.231395 |
| 7        | O     | 45.981398 | 35.477258 | 49.579710 |
| 8        | C     | 43.870129 | 37.050787 | 50.538057 |
| 9        | C     | 42.828630 | 37.869336 | 50.981774 |
| 10       | O     | 48.720594 | 37.229993 | 45.560947 |
| 11       | C     | 48.575595 | 38.888098 | 43.242275 |
| 12       | C     | 48.445143 | 39.660492 | 42.085654 |
| 13       | O     | 48.721525 | 35.390599 | 44.267697 |
| 14       | C     | 48.480347 | 36.869040 | 41.905637 |
| 15       | C     | 48.350675 | 37.640758 | 40.748344 |
| 16       | O     | 47.099747 | 37.266064 | 48.837386 |
| 17       | C     | 45.114938 | 39.010214 | 49.842979 |
| 18       | C     | 44.073923 | 39.829476 | 50.286431 |
| 19       | O     | 45.803709 | 32.502948 | 47.193930 |
| 20       | C     | 43.645023 | 31.204252 | 45.961700 |
| 21       | C     | 42.593638 | 30.555897 | 45.309337 |
| 22       | C     | 45.935296 | 32.271635 | 45.961497 |
| 23       | C     | 44.802865 | 31.569272 | 45.255240 |
| 24       | C     | 42.689567 | 30.265153 | 43.942812 |
| 25       | C     | 46.135538 | 36.728907 | 49.462963 |
| 26       | C     | 45.022522 | 37.613936 | 49.965422 |

|    |    |           |           |           |
|----|----|-----------|-----------|-----------|
| 27 | C  | 42.928518 | 39.260494 | 50.856733 |
| 28 | C  | 48.735482 | 36.653830 | 44.412868 |
| 29 | C  | 48.595186 | 37.485939 | 43.162297 |
| 30 | C  | 48.333277 | 39.038182 | 40.836116 |
| 31 | H  | 48.262721 | 37.152615 | 39.774311 |
| 32 | H  | 48.232143 | 39.642347 | 39.930722 |
| 33 | H  | 48.430574 | 40.751117 | 42.156783 |
| 34 | H  | 48.663386 | 39.359531 | 44.222553 |
| 35 | H  | 48.494405 | 35.779257 | 41.851868 |
| 36 | H  | 45.792528 | 31.564785 | 43.341938 |
| 37 | H  | 43.917095 | 30.401817 | 42.164547 |
| 38 | H  | 41.867356 | 29.756999 | 43.432190 |
| 39 | H  | 41.695967 | 30.275666 | 45.866474 |
| 40 | H  | 43.583753 | 31.437433 | 47.026012 |
| 41 | H  | 46.011098 | 39.440155 | 49.392684 |
| 42 | H  | 44.153492 | 40.914990 | 50.186104 |
| 43 | H  | 42.113051 | 39.901205 | 51.202423 |
| 44 | H  | 41.934819 | 37.422766 | 51.424955 |
| 45 | H  | 43.803423 | 35.965130 | 50.625402 |
| 46 | Zr | 48.791712 | 33.785530 | 45.904609 |
| 47 | Zr | 47.285731 | 33.787243 | 48.606736 |
| 48 | Zr | 48.876596 | 36.286364 | 47.723271 |
| 49 | O  | 47.350883 | 35.051606 | 46.895437 |
| 50 | Co | 45.648651 | 35.771260 | 46.350267 |
| 51 | O  | 43.942003 | 36.354218 | 45.923459 |
| 52 | N  | 43.942689 | 37.534616 | 46.700962 |
| 53 | C  | 44.182989 | 38.739088 | 46.063347 |
| 54 | C  | 43.773929 | 39.951878 | 46.663578 |
| 55 | C  | 44.915285 | 38.789620 | 44.859964 |
| 56 | C  | 44.094970 | 41.170452 | 46.068753 |
| 57 | H  | 43.205989 | 39.925280 | 47.598823 |
| 58 | C  | 45.218179 | 40.018474 | 44.272435 |
| 59 | H  | 45.236131 | 37.849686 | 44.403896 |
| 60 | C  | 44.822476 | 41.219488 | 44.869331 |
| 61 | H  | 43.763855 | 42.097499 | 46.550385 |
| 62 | H  | 45.788627 | 40.028769 | 43.337800 |
| 63 | H  | 45.065864 | 42.180486 | 44.404836 |
| 64 | H  | 43.177187 | 37.542852 | 47.370968 |

### Cartesian coordinates of INT-3

Coordinates (Angstroms)

| Atom No. | Atoms | X         | Y         | Z         |
|----------|-------|-----------|-----------|-----------|
| 1        | O     | 50.105775 | 35.041738 | 46.747795 |
| 2        | O     | 48.612133 | 32.694754 | 47.577010 |
| 3        | O     | 48.740260 | 35.001549 | 49.253527 |
| 4        | O     | 46.941986 | 32.595757 | 45.254696 |
| 5        | C     | 44.890776 | 31.276143 | 43.884384 |
| 6        | C     | 43.840147 | 30.626907 | 43.231395 |
| 7        | O     | 45.981398 | 35.477258 | 49.579710 |
| 8        | C     | 43.870129 | 37.050787 | 50.538057 |
| 9        | C     | 42.828630 | 37.869336 | 50.981774 |
| 10       | O     | 48.720594 | 37.229993 | 45.560947 |
| 11       | C     | 48.575595 | 38.888098 | 43.242275 |
| 12       | C     | 48.445143 | 39.660492 | 42.085654 |
| 13       | O     | 48.721525 | 35.390599 | 44.267697 |
| 14       | C     | 48.480347 | 36.869040 | 41.905637 |
| 15       | C     | 48.350675 | 37.640758 | 40.748344 |
| 16       | O     | 47.099747 | 37.266064 | 48.837386 |
| 17       | C     | 45.114938 | 39.010214 | 49.842979 |
| 18       | C     | 44.073923 | 39.829476 | 50.286431 |
| 19       | O     | 45.803709 | 32.502948 | 47.193930 |
| 20       | C     | 43.645023 | 31.204252 | 45.961700 |
| 21       | C     | 42.593638 | 30.555897 | 45.309337 |
| 22       | C     | 45.935296 | 32.271635 | 45.961497 |
| 23       | C     | 44.802865 | 31.569272 | 45.255240 |
| 24       | C     | 42.689567 | 30.265153 | 43.942812 |
| 25       | C     | 46.135538 | 36.728907 | 49.462963 |
| 26       | C     | 45.022522 | 37.613936 | 49.965422 |
| 27       | C     | 42.928518 | 39.260494 | 50.856733 |
| 28       | C     | 48.735482 | 36.653830 | 44.412868 |
| 29       | C     | 48.595186 | 37.485939 | 43.162297 |
| 30       | C     | 48.333277 | 39.038182 | 40.836116 |
| 31       | H     | 48.262721 | 37.152615 | 39.774311 |
| 32       | H     | 48.232143 | 39.642347 | 39.930722 |
| 33       | H     | 48.430574 | 40.751117 | 42.156783 |
| 34       | H     | 48.663386 | 39.359531 | 44.222553 |

|    |    |           |           |           |    |   |           |           |           |
|----|----|-----------|-----------|-----------|----|---|-----------|-----------|-----------|
| 35 | H  | 48.494405 | 35.779257 | 41.851868 | 4  | O | 46.797310 | 32.634531 | 45.192278 |
| 36 | H  | 45.792528 | 31.564785 | 43.341938 | 5  | C | 44.746103 | 31.314899 | 43.821991 |
| 37 | H  | 43.917095 | 30.401817 | 42.164547 | 6  | C | 43.695474 | 30.665663 | 43.169003 |
| 38 | H  | 41.867356 | 29.756999 | 43.432190 | 7  | O | 45.836762 | 35.516038 | 49.517322 |
| 39 | H  | 41.695967 | 30.275666 | 45.866474 | 8  | C | 43.725456 | 37.089543 | 50.475664 |
| 40 | H  | 43.583753 | 31.437433 | 47.026012 | 9  | C | 42.683957 | 37.908092 | 50.919382 |
| 41 | H  | 46.011098 | 39.440155 | 49.392684 | 10 | O | 48.576213 | 37.267879 | 45.498608 |
| 42 | H  | 44.153492 | 40.914990 | 50.186104 | 11 | C | 48.430922 | 38.926854 | 43.179882 |
| 43 | H  | 42.113051 | 39.901205 | 51.202423 | 12 | C | 48.300470 | 39.699248 | 42.023262 |
| 44 | H  | 41.934819 | 37.422766 | 51.424955 | 13 | O | 48.577066 | 35.429370 | 44.205324 |
| 45 | H  | 43.803423 | 35.965130 | 50.625402 | 14 | C | 48.335674 | 36.907796 | 41.843245 |
| 46 | Zr | 48.791712 | 33.785530 | 45.904609 | 15 | C | 48.206001 | 37.679514 | 40.685952 |
| 47 | Zr | 47.285731 | 33.787243 | 48.606736 | 16 | O | 46.954569 | 37.304373 | 48.774304 |
| 48 | Zr | 48.876596 | 36.286364 | 47.723271 | 17 | C | 44.970265 | 39.048969 | 49.780587 |
| 49 | O  | 47.350883 | 35.051606 | 46.895437 | 18 | C | 43.929250 | 39.868232 | 50.224038 |
| 50 | Co | 45.648651 | 35.771260 | 46.350267 | 19 | O | 45.658999 | 32.541728 | 47.131554 |
| 51 | O  | 43.942003 | 36.354218 | 45.923459 | 20 | C | 43.500350 | 31.243008 | 45.899307 |
| 52 | N  | 43.942689 | 37.534616 | 46.700962 | 21 | C | 42.448965 | 30.594653 | 45.246945 |
| 53 | C  | 44.182989 | 38.739088 | 46.063347 | 22 | C | 45.790623 | 32.310391 | 45.899105 |
| 54 | C  | 43.773929 | 39.951878 | 46.663578 | 23 | C | 44.658192 | 31.608028 | 45.192848 |
| 55 | C  | 44.915285 | 38.789620 | 44.859964 | 24 | C | 42.544894 | 30.303909 | 43.880419 |
| 56 | C  | 44.094970 | 41.170452 | 46.068753 | 25 | C | 45.990991 | 36.767645 | 49.400750 |
| 57 | H  | 43.205989 | 39.925280 | 47.598823 | 26 | C | 44.877818 | 37.652684 | 49.902976 |
| 58 | C  | 45.218179 | 40.018474 | 44.272435 | 27 | C | 42.783844 | 39.299250 | 50.794340 |
| 59 | H  | 45.236131 | 37.849686 | 44.403896 | 28 | C | 48.590308 | 36.693000 | 44.350261 |
| 60 | C  | 44.822476 | 41.219488 | 44.869331 | 29 | C | 48.450518 | 37.524696 | 43.099905 |
| 61 | H  | 43.763855 | 42.097499 | 46.550385 | 30 | C | 48.188604 | 39.076938 | 40.773723 |
| 62 | H  | 45.788627 | 40.028769 | 43.337800 | 31 | H | 48.118048 | 37.191371 | 39.711919 |
| 63 | H  | 45.065864 | 42.180486 | 44.404836 | 32 | H | 48.087469 | 39.681103 | 39.868329 |
| 64 | H  | 43.177187 | 37.542852 | 47.370968 | 33 | H | 48.285900 | 40.789873 | 42.094391 |

-----  
**Cartesian coordinates of TS-4**  
 -----

Coordinates (Angstroms)

| Atom No. | Atoms | X         | Y         | Z         |
|----------|-------|-----------|-----------|-----------|
| 1        | O     | 49.961123 | 35.080503 | 46.685418 |
| 2        | O     | 48.467390 | 32.733461 | 47.514579 |
| 3        | O     | 48.595795 | 35.040202 | 49.191068 |

|    |   |           |           |           |
|----|---|-----------|-----------|-----------|
| 4  | O | 46.797310 | 32.634531 | 45.192278 |
| 5  | C | 44.746103 | 31.314899 | 43.821991 |
| 6  | C | 43.695474 | 30.665663 | 43.169003 |
| 7  | O | 45.836762 | 35.516038 | 49.517322 |
| 8  | C | 43.725456 | 37.089543 | 50.475664 |
| 9  | C | 42.683957 | 37.908092 | 50.919382 |
| 10 | O | 48.576213 | 37.267879 | 45.498608 |
| 11 | C | 48.430922 | 38.926854 | 43.179882 |
| 12 | C | 48.300470 | 39.699248 | 42.023262 |
| 13 | O | 48.577066 | 35.429370 | 44.205324 |
| 14 | C | 48.335674 | 36.907796 | 41.843245 |
| 15 | C | 48.206001 | 37.679514 | 40.685952 |
| 16 | O | 46.954569 | 37.304373 | 48.774304 |
| 17 | C | 44.970265 | 39.048969 | 49.780587 |
| 18 | C | 43.929250 | 39.868232 | 50.224038 |
| 19 | O | 45.658999 | 32.541728 | 47.131554 |
| 20 | C | 43.500350 | 31.243008 | 45.899307 |
| 21 | C | 42.448965 | 30.594653 | 45.246945 |
| 22 | C | 45.790623 | 32.310391 | 45.899105 |
| 23 | C | 44.658192 | 31.608028 | 45.192848 |
| 24 | C | 42.544894 | 30.303909 | 43.880419 |
| 25 | C | 45.990991 | 36.767645 | 49.400750 |
| 26 | C | 44.877818 | 37.652684 | 49.902976 |
| 27 | C | 42.783844 | 39.299250 | 50.794340 |
| 28 | C | 48.590308 | 36.693000 | 44.350261 |
| 29 | C | 48.450518 | 37.524696 | 43.099905 |
| 30 | C | 48.188604 | 39.076938 | 40.773723 |
| 31 | H | 48.118048 | 37.191371 | 39.711919 |
| 32 | H | 48.087469 | 39.681103 | 39.868329 |
| 33 | H | 48.285900 | 40.789873 | 42.094391 |
| 34 | H | 48.518713 | 39.398287 | 44.160161 |
| 35 | H | 48.349731 | 35.818013 | 41.789475 |
| 36 | H | 45.647855 | 31.603541 | 43.279545 |
| 37 | H | 43.772422 | 30.440572 | 42.102154 |
| 38 | H | 41.722683 | 29.795754 | 43.369797 |
| 39 | H | 41.551294 | 30.314422 | 45.804082 |
| 40 | H | 43.439080 | 31.476189 | 46.963620 |
| 41 | H | 45.866425 | 39.478911 | 49.330291 |
| 42 | H | 44.008818 | 40.953746 | 50.123711 |

|    |    |           |           |           |
|----|----|-----------|-----------|-----------|
| 43 | H  | 41.968378 | 39.939961 | 51.140030 |
| 44 | H  | 41.790146 | 37.461522 | 51.362563 |
| 45 | H  | 43.658749 | 36.003886 | 50.563009 |
| 46 | Zr | 48.646916 | 33.824091 | 45.842288 |
| 47 | Zr | 47.140983 | 33.825713 | 48.544129 |
| 48 | Zr | 48.731764 | 36.325263 | 47.660901 |
| 49 | O  | 47.206809 | 35.091691 | 46.833967 |
| 50 | Co | 45.767616 | 36.798906 | 46.323054 |
| 51 | H  | 45.934966 | 38.368953 | 46.067601 |
| 52 | O  | 44.518250 | 35.307383 | 46.735683 |
| 53 | C  | 43.346892 | 35.762402 | 46.565545 |
| 54 | O  | 42.266145 | 35.364783 | 46.959651 |

-----  
**Cartesian coordinates of INT-4**  
 -----

Coordinates (Angstroms)

| Atom No. | Atoms | X | Y | Z |
|----------|-------|---|---|---|
|----------|-------|---|---|---|

-----

|    |   |           |           |           |
|----|---|-----------|-----------|-----------|
| 1  | O | 50.105792 | 35.041745 | 46.747807 |
| 2  | O | 48.612060 | 32.694703 | 47.576968 |
| 3  | O | 48.740465 | 35.001444 | 49.253457 |
| 4  | O | 46.941980 | 32.595772 | 45.254667 |
| 5  | C | 44.890772 | 31.276141 | 43.884381 |
| 6  | C | 43.840144 | 30.626905 | 43.231392 |
| 7  | O | 45.981432 | 35.477279 | 49.579711 |
| 8  | C | 43.870126 | 37.050784 | 50.538053 |
| 9  | C | 42.828627 | 37.869333 | 50.981770 |
| 10 | O | 48.720882 | 37.229121 | 45.560997 |
| 11 | C | 48.575592 | 38.888095 | 43.242272 |
| 12 | C | 48.445139 | 39.660490 | 42.085651 |
| 13 | O | 48.721735 | 35.390611 | 44.267713 |
| 14 | C | 48.480343 | 36.869038 | 41.905634 |
| 15 | C | 48.350671 | 37.640756 | 40.748341 |
| 16 | O | 47.099239 | 37.265614 | 48.836693 |
| 17 | C | 45.114935 | 39.010211 | 49.842975 |
| 18 | C | 44.073920 | 39.829473 | 50.286427 |
| 19 | O | 45.803668 | 32.502970 | 47.193943 |
| 20 | C | 43.645020 | 31.204250 | 45.961696 |
| 21 | C | 42.593635 | 30.555895 | 45.309334 |

|    |    |           |           |           |
|----|----|-----------|-----------|-----------|
| 22 | C  | 45.935293 | 32.271633 | 45.961494 |
| 23 | C  | 44.802861 | 31.569270 | 45.255237 |
| 24 | C  | 42.689564 | 30.265151 | 43.942808 |
| 25 | C  | 46.135661 | 36.728887 | 49.463139 |
| 26 | C  | 45.022488 | 37.613925 | 49.965365 |
| 27 | C  | 42.928515 | 39.260491 | 50.856729 |
| 28 | C  | 48.734977 | 36.654241 | 44.412650 |
| 29 | C  | 48.595188 | 37.485937 | 43.162294 |
| 30 | C  | 48.333274 | 39.038179 | 40.836113 |
| 31 | H  | 48.262718 | 37.152612 | 39.774308 |
| 32 | H  | 48.232139 | 39.642344 | 39.930719 |
| 33 | H  | 48.430570 | 40.751114 | 42.156780 |
| 34 | H  | 48.663382 | 39.359528 | 44.222550 |
| 35 | H  | 48.494401 | 35.779254 | 41.851864 |
| 36 | H  | 45.792525 | 31.564783 | 43.341934 |
| 37 | H  | 43.917092 | 30.401814 | 42.164544 |
| 38 | H  | 41.867353 | 29.756996 | 43.432186 |
| 39 | H  | 41.695964 | 30.275664 | 45.866471 |
| 40 | H  | 43.583750 | 31.437431 | 47.026009 |
| 41 | H  | 46.011095 | 39.440152 | 49.392680 |
| 42 | H  | 44.153488 | 40.914987 | 50.186100 |
| 43 | H  | 42.113048 | 39.901203 | 51.202419 |
| 44 | H  | 41.934816 | 37.422763 | 51.424952 |
| 45 | H  | 43.803419 | 35.965127 | 50.625398 |
| 46 | Zr | 48.791586 | 33.785332 | 45.904677 |
| 47 | Zr | 47.285652 | 33.786954 | 48.606518 |
| 48 | Zr | 48.876434 | 36.286504 | 47.723290 |
| 49 | O  | 47.351479 | 35.052932 | 46.896356 |
| 50 | Co | 46.359185 | 36.580679 | 46.519541 |
| 51 | O  | 44.698117 | 36.768761 | 45.799902 |
| 52 | C  | 44.457157 | 38.148041 | 45.509345 |
| 53 | H  | 45.210021 | 38.877506 | 45.723765 |
| 54 | O  | 43.362725 | 38.506847 | 45.002345 |

-----  
**Cartesian coordinates of INT-5**  
 -----

Coordinates (Angstroms)

| Atom No. | Atoms | X | Y | Z |
|----------|-------|---|---|---|
|----------|-------|---|---|---|

-----

|    |   |           |           |           |    |    |           |           |           |
|----|---|-----------|-----------|-----------|----|----|-----------|-----------|-----------|
| 1  | O | 50.210577 | 35.371782 | 48.578137 | 40 | H  | 43.263168 | 33.600188 | 46.528677 |
| 2  | O | 48.076661 | 33.404522 | 48.518723 | 41 | H  | 46.575303 | 40.265050 | 51.017114 |
| 3  | O | 48.215540 | 35.333370 | 50.618331 | 42 | H  | 44.929827 | 42.046084 | 51.630044 |
| 4  | O | 47.152456 | 34.078957 | 45.895162 | 43 | H  | 42.517322 | 41.467870 | 51.893760 |
| 5  | C | 45.340761 | 33.552230 | 43.829519 | 44 | H  | 41.756878 | 39.117184 | 51.547416 |
| 6  | C | 44.404674 | 33.300931 | 42.823382 | 45 | H  | 43.418055 | 37.350561 | 50.934878 |
| 7  | O | 45.645897 | 36.463659 | 50.364524 | 46 | Zr | 48.951959 | 34.637117 | 47.202376 |
| 8  | C | 43.737660 | 38.381788 | 51.093470 | 47 | Zr | 46.778883 | 34.647582 | 49.403627 |
| 9  | C | 42.813632 | 39.372553 | 51.434322 | 48 | Zr | 49.051563 | 36.742756 | 49.466651 |
| 10 | O | 49.836683 | 37.998052 | 47.564569 | 49 | O  | 47.596093 | 36.082626 | 48.060228 |
| 11 | C | 50.597380 | 39.944123 | 45.685243 | 50 | Co | 46.485930 | 37.352720 | 46.884096 |
| 12 | C | 50.968638 | 40.880586 | 44.717469 | 51 | Si | 46.614393 | 39.674540 | 46.432325 |
| 13 | O | 49.694363 | 36.421241 | 45.966557 | 52 | H  | 47.220010 | 38.601172 | 47.494751 |
| 14 | C | 50.454762 | 38.232680 | 43.975598 | 53 | H  | 45.179587 | 40.071543 | 46.578844 |
| 15 | C | 50.826795 | 39.168389 | 43.007232 | 54 | O  | 45.150690 | 36.990700 | 45.343302 |
| 16 | O | 47.297884 | 37.989771 | 50.408041 | 55 | O  | 44.287807 | 37.093931 | 47.381522 |
| 17 | C | 45.517898 | 40.025153 | 51.139843 | 56 | C  | 44.166312 | 36.915319 | 46.145612 |
| 18 | C | 44.594547 | 41.016510 | 51.480704 | 57 | H  | 46.979516 | 39.640549 | 44.981958 |
| 19 | O | 45.518912 | 34.011781 | 47.441825 | 58 | C  | 47.681484 | 41.041691 | 47.192372 |
| 20 | C | 43.572136 | 33.513461 | 45.485650 | 59 | C  | 48.059790 | 42.176029 | 46.453716 |
| 21 | C | 42.635353 | 33.263112 | 44.480108 | 60 | C  | 48.146621 | 40.929160 | 48.514800 |
| 22 | C | 45.941687 | 33.932385 | 46.256615 | 61 | C  | 48.877691 | 43.163041 | 47.011540 |
| 23 | C | 44.932851 | 33.659406 | 45.169304 | 62 | H  | 47.730097 | 42.283461 | 45.416138 |
| 24 | C | 43.050041 | 33.155493 | 43.146850 | 63 | C  | 48.962912 | 41.913039 | 49.080699 |
| 25 | C | 46.091170 | 37.634436 | 50.550824 | 64 | H  | 47.874855 | 40.051450 | 49.107367 |
| 26 | C | 45.097776 | 38.699178 | 50.943817 | 65 | C  | 49.333796 | 43.032174 | 48.327502 |
| 27 | C | 43.240365 | 40.692062 | 51.628564 | 66 | H  | 49.167879 | 44.032513 | 46.415882 |
| 28 | C | 49.936313 | 37.602904 | 46.369652 | 67 | H  | 49.314655 | 41.805484 | 50.110515 |
| 29 | C | 50.338093 | 38.612075 | 45.322964 | 68 | H  | 49.978002 | 43.799676 | 48.764105 |
| 30 | C | 51.084922 | 40.494228 | 43.376449 | 69 | H  | 43.167192 | 36.676600 | 45.714296 |
| 31 | H | 50.916085 | 38.864509 | 41.961075 |    |    |           |           |           |
| 32 | H | 51.376361 | 41.226588 | 42.619023 |    |    |           |           |           |
| 33 | H | 51.168423 | 41.915227 | 45.007879 |    |    |           |           |           |
| 34 | H | 50.502589 | 40.231205 | 46.733814 |    |    |           |           |           |
| 35 | H | 50.249759 | 37.196498 | 43.701702 |    |    |           |           |           |
| 36 | H | 46.399250 | 33.668946 | 43.591405 |    |    |           |           |           |
| 37 | H | 44.730749 | 33.218181 | 41.783391 |    |    |           |           |           |
| 38 | H | 42.317341 | 32.958706 | 42.359822 |    |    |           |           |           |
| 39 | H | 41.578318 | 33.151258 | 44.734880 |    |    |           |           |           |

-----  
**Cartesian coordinates of TS-5**  
 -----

Coordinates (Angstroms)

| Atom No. | Atoms | X         | Y         | Z         |
|----------|-------|-----------|-----------|-----------|
| 1        | O     | 50.210602 | 35.371812 | 48.578128 |
| 2        | O     | 48.076672 | 33.404528 | 48.518734 |
| 3        | O     | 48.215508 | 35.333412 | 50.618355 |

|    |   |           |           |           |    |    |           |           |           |
|----|---|-----------|-----------|-----------|----|----|-----------|-----------|-----------|
| 4  | O | 47.152462 | 34.078960 | 45.895170 | 43 | H  | 42.517328 | 41.467875 | 51.893767 |
| 5  | C | 45.340768 | 33.552235 | 43.829525 | 44 | H  | 41.756884 | 39.117190 | 51.547423 |
| 6  | C | 44.404680 | 33.300936 | 42.823388 | 45 | H  | 43.418061 | 37.350567 | 50.934886 |
| 7  | O | 45.645907 | 36.463658 | 50.364557 | 46 | Zr | 48.952028 | 34.637148 | 47.202436 |
| 8  | C | 43.737663 | 38.381791 | 51.093469 | 47 | Zr | 46.779000 | 34.647533 | 49.403643 |
| 9  | C | 42.813639 | 39.372559 | 51.434330 | 48 | Zr | 49.051664 | 36.742533 | 49.466605 |
| 10 | O | 49.836699 | 37.997808 | 47.564899 | 49 | O  | 47.595810 | 36.082701 | 48.060543 |
| 11 | C | 50.597387 | 39.944129 | 45.685250 | 50 | Co | 47.399727 | 38.239767 | 47.716812 |
| 12 | C | 50.968646 | 40.880592 | 44.717476 | 51 | Si | 48.057617 | 41.123113 | 48.474213 |
| 13 | O | 49.694389 | 36.421234 | 45.966555 | 52 | H  | 47.487604 | 39.756913 | 48.697105 |
| 14 | C | 50.454769 | 38.232685 | 43.975604 | 53 | H  | 47.148267 | 42.120235 | 49.105681 |
| 15 | C | 50.826803 | 39.168394 | 43.007239 | 54 | O  | 45.311482 | 40.544698 | 47.309377 |
| 16 | O | 47.298056 | 37.989562 | 50.407489 | 55 | O  | 45.369960 | 38.391179 | 47.966326 |
| 17 | C | 45.517905 | 40.025159 | 51.139850 | 56 | C  | 44.815371 | 39.523052 | 47.822097 |
| 18 | C | 44.594554 | 41.016516 | 51.480711 | 57 | H  | 48.265602 | 41.457775 | 47.044268 |
| 19 | O | 45.518922 | 34.011783 | 47.441830 | 58 | C  | 49.717572 | 41.077285 | 49.367579 |
| 20 | C | 43.572142 | 33.513466 | 45.485657 | 59 | C  | 50.848614 | 41.766367 | 48.896539 |
| 21 | C | 42.635359 | 33.263116 | 44.480115 | 60 | C  | 49.855617 | 40.300980 | 50.536009 |
| 22 | C | 45.941694 | 33.932390 | 46.256622 | 61 | C  | 52.078942 | 41.672947 | 49.555710 |
| 23 | C | 44.932858 | 33.659411 | 45.169310 | 62 | H  | 50.776605 | 42.377551 | 47.992391 |
| 24 | C | 43.050047 | 33.155498 | 43.146856 | 63 | C  | 51.082532 | 40.205685 | 51.200279 |
| 25 | C | 46.091121 | 37.634657 | 50.550899 | 64 | H  | 48.992997 | 39.754768 | 50.928088 |
| 26 | C | 45.097777 | 38.699189 | 50.943795 | 65 | C  | 52.199570 | 40.889507 | 50.707259 |
| 27 | C | 43.240372 | 40.692068 | 51.628571 | 66 | H  | 52.947374 | 42.210130 | 49.166400 |
| 28 | C | 49.936212 | 37.603302 | 46.369519 | 67 | H  | 51.167686 | 39.599434 | 52.106312 |
| 29 | C | 50.338114 | 38.612077 | 45.322972 | 68 | H  | 53.160915 | 40.813480 | 51.221141 |
| 30 | C | 51.084930 | 40.494233 | 43.376455 | 69 | H  | 43.762622 | 39.581942 | 48.200219 |
| 31 | H | 50.916092 | 38.864515 | 41.961081 | 70 | N  | 47.238030 | 39.054107 | 45.735055 |
| 32 | H | 51.376368 | 41.226594 | 42.619029 | 71 | H  | 46.719923 | 39.883567 | 46.050019 |
| 33 | H | 51.168430 | 41.915233 | 45.007886 | 72 | H  | 48.146381 | 39.329119 | 45.356158 |
| 34 | H | 50.502596 | 40.231210 | 46.733821 | 73 | C  | 46.471668 | 38.335396 | 44.774038 |
| 35 | H | 50.249766 | 37.196504 | 43.701708 | 74 | C  | 47.043433 | 37.266059 | 44.069763 |
| 36 | H | 46.399257 | 33.668951 | 43.591411 | 75 | C  | 45.133116 | 38.679060 | 44.533043 |
| 37 | H | 44.730756 | 33.218186 | 41.783397 | 76 | C  | 46.294591 | 36.581033 | 43.113860 |
| 38 | H | 42.317347 | 32.958710 | 42.359829 | 77 | H  | 48.067777 | 36.970695 | 44.290003 |
| 39 | H | 41.578324 | 33.151263 | 44.734887 | 78 | C  | 44.381619 | 37.965156 | 43.595947 |
| 40 | H | 43.263174 | 33.600193 | 46.528684 | 79 | H  | 44.693834 | 39.514853 | 45.079348 |
| 41 | H | 46.575310 | 40.265056 | 51.017121 | 80 | C  | 44.958628 | 36.917938 | 42.873358 |
| 42 | H | 44.929834 | 42.046090 | 51.630052 | 81 | H  | 46.758417 | 35.763399 | 42.559240 |

|    |   |           |           |           |
|----|---|-----------|-----------|-----------|
| 82 | H | 43.337764 | 38.240396 | 43.424082 |
| 83 | H | 44.372161 | 36.359129 | 42.141476 |

---

## 7. XPS analysis.

All the binding energies were corrected with reference to the C1s peak at 284.8 eV. CasaXPS software was used for peak analysis and de-convolution studies.

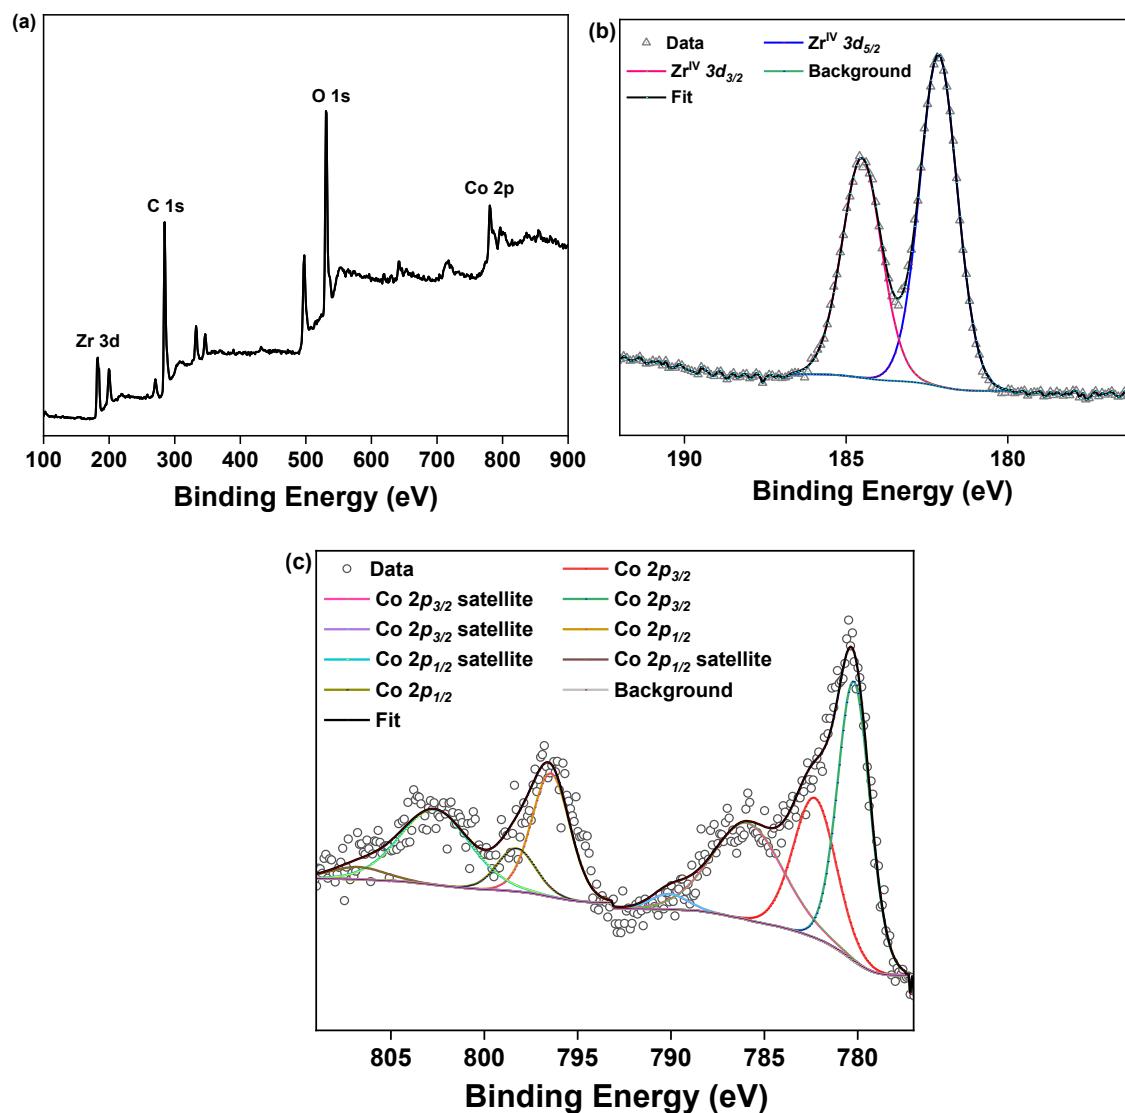

**Figure S15.** (a) Raw XPS data of UiO-67-CoH before catalysis. (b) XPS fitting of zirconium 3d in UiO-67-CoH before catalysis. (c) XPS fitting of cobalt 2p in UiO-67-CoH before catalysis.

| Component         | Position (eV) | FWHM (eV) | Area% | Line shape |
|-------------------|---------------|-----------|-------|------------|
| Co(II) $2p_{3/2}$ | 780.5         | 2.0       | 26.21 | GL (30)    |
| Co(II) $2p_{3/2}$ | 782.06        | 2.7       | 17.29 | GL (30)    |
| Co(II) $2p_{3/2}$ | 786.01        | 4.4       | 19.63 | GL (30)    |
| Co(II) $2p_{3/2}$ | 790.41        | 2.3       | 1.62  | GL (30)    |
| Co(II) $2p_{1/2}$ | 796.12        | 2.4       | 13.49 | GL (30)    |

|                   |        |     |       |         |
|-------------------|--------|-----|-------|---------|
| Co(II) $2p_{1/2}$ | 797.58 | 2.1 | 4.72  | GL (30) |
| Co(II) $2p_{1/2}$ | 802.43 | 4.4 | 15.09 | GL (30) |
| Co(II) $2p_{1/2}$ | 806.32 | 3.5 | 1.96  | GL (30) |

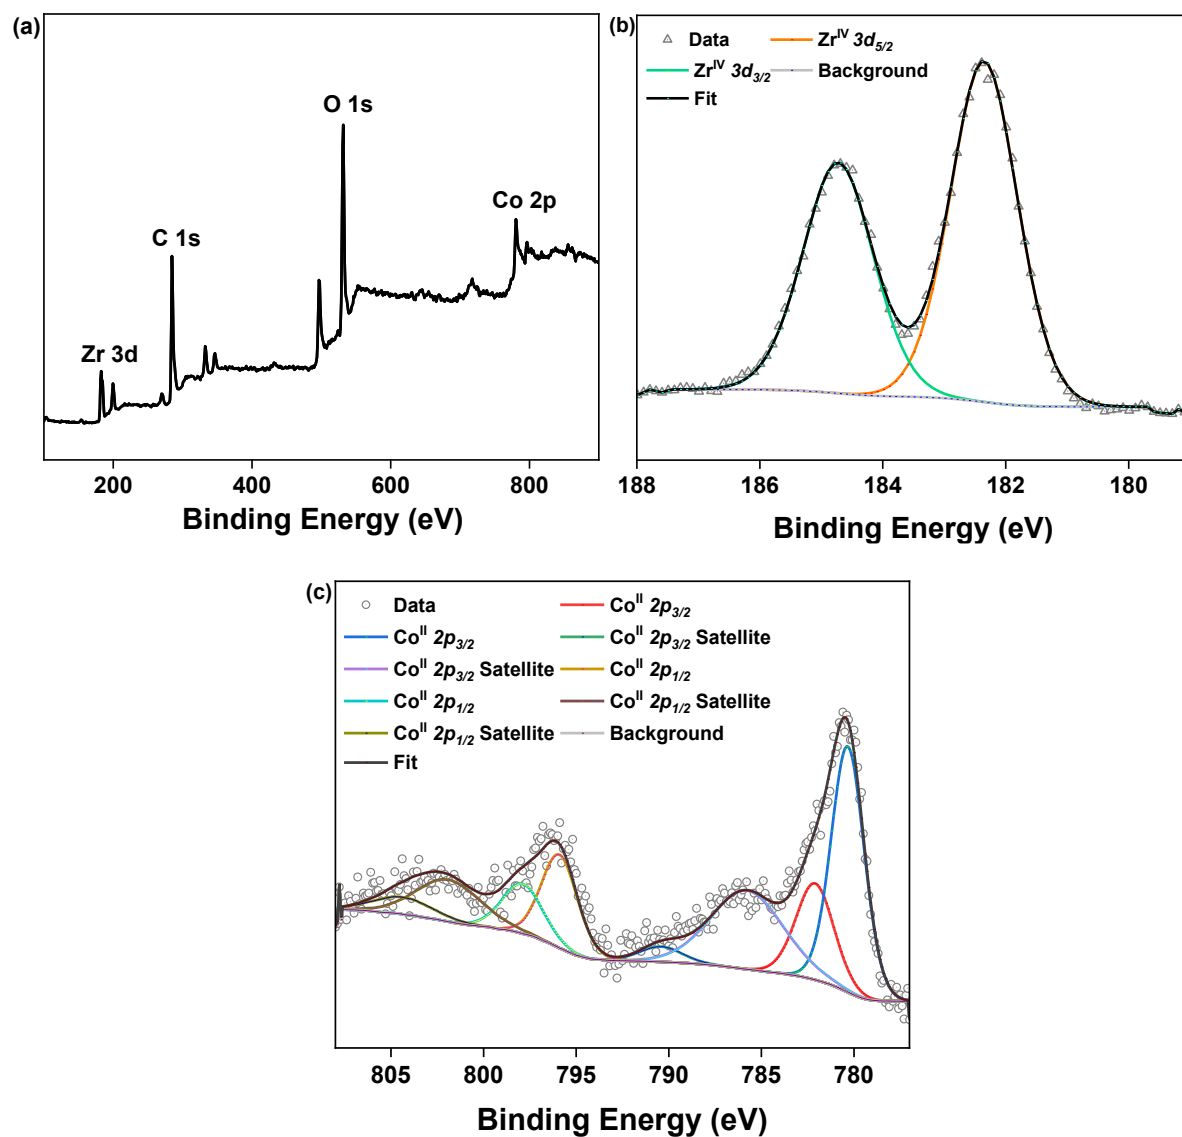

**Figure S16.** (a) Raw XPS data of UiO-67-Co after catalysis. (b) XPS fitting of zirconium 3d in UiO-67-Co after catalysis. (c) XPS fitting of cobalt 2p in UiO-67-Co after catalysis.

| Component         | Position (eV) | FWHM (eV) | Area% | Line shape |
|-------------------|---------------|-----------|-------|------------|
| Co(II) $2p_{3/2}$ | 780.30        | 2.1       | 29.90 | GL (30)    |
| Co(II) $2p_{3/2}$ | 782.45        | 2.4       | 13.45 | GL (30)    |
| Co(II) $2p_{3/2}$ | 785.92        | 4.5       | 20.89 | GL (30)    |

|                   |        |      |       |         |
|-------------------|--------|------|-------|---------|
| Co(II) $2p_{3/2}$ | 790.23 | 2.7  | 2.38  | GL (30) |
| Co(II) $2p_{1/2}$ | 796.09 | 2.3  | 12.38 | GL (30) |
| Co(II) $2p_{1/2}$ | 798.10 | 2.5  | 7.42  | GL (30) |
| Co(II) $2p_{1/2}$ | 802.35 | 4.0  | 9.88  | GL (30) |
| Co(II) $2p_{1/2}$ | 806.04 | 3.79 | 3.70  | GL (30) |

## 8. Characterization of the synthesized *N*-formylated products.

The conversion and the yield for *N*-formylation reactions were determined by Agilent 7890B gas chromatograph equipped with a mass detector (Agilent 5977B GC/MSD) and HP-5MS UltraInert 30m-250 $\mu$ m-0.25 $\mu$ m column for GC-MS with the following chromatographic conditions: He was used as the carrier gas with a flow rate of 1 mL min<sup>-1</sup>, an injection volume of 5.0  $\mu$ L, an initial column oven temperature of 100 °C which was gradually increased to 250 °C at a rate of 5 °C min<sup>-1</sup> and a detector temperature of 250 °C. The conversion of the reactants were analyzed by GC-MS using area-percent method and yield of the products were determined by GC using mesitylene as an internal standard.

**Table S8.** GC-MS retention time of the *N*-formylated products catalyzed by UiO-67-CoH.

| SNo. | Products                                                                            | GC-MS retention time | SNo. | Products                                                                              | GC-MS retention time |
|------|-------------------------------------------------------------------------------------|----------------------|------|---------------------------------------------------------------------------------------|----------------------|
| 1.   | 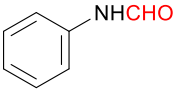  | 13.03                | 9.   |    | 19.21                |
| 2.   |  | 13.64                | 10.  |   | 15.23                |
| 3.   |  | 13.06                | 11.  |   | 11.05                |
| 4.   |  | 12.79                | 12.  |  | 11.49                |
| 5.   |  | 12.46                | 13.  |   | 14.66                |
| 6.   |  | 15.36                | 14.  |   | 15.21                |
| 7.   |  | 10.92                | 15.  |   | 16.80                |
| 8.   |  | 13.28                | 16.  |   | 16.59                |

|     |  |       |
|-----|--|-------|
| 17. |  | 8.95  |
| 18. |  | 10.76 |
| 19. |  | 13.21 |
| 20. |  | 16.32 |
| 21. |  | 11.28 |
| 22. |  | 15.91 |

|     |  |       |
|-----|--|-------|
| 23. |  | 11.68 |
| 24. |  | 11.11 |
| 25. |  | 4.44  |
| 26. |  | 5.16  |
| 27. |  | 4.89  |
| 28. |  | 9.76  |

### 8.1 NMR data of the *N*-formylated products.

#### *N*-Phenylformamide (2a).<sup>13</sup>

<sup>1</sup>H NMR (400 MHz, CDCl<sub>3</sub>, ppm):  $\delta$  8.63 (d, *J* = 11.4 Hz, 1H, trans), 8.31 (d, *J* = 1.2 Hz, 1H, cis), 8.04 (brs, 1H, cis), 7.47 (d, 2H), 7.33-7.23 (m, 4H), 7.16-7.05 (m, 2H), 7.04-6.99 (d, 2H). GC-MS: 121.1.

#### *N-p*-Tolylformamide (2b).<sup>13</sup>

<sup>1</sup>H NMR (400 MHz, CDCl<sub>3</sub>, ppm):  $\delta$  8.55 (d, *J* = 11.5 Hz, 1H, trans), 8.27 (d, *J* = 1.6 Hz, 0.89H, cis), 8.18 (brs, 0.88H, trans), 7.41 (brs, 0.60H, cis), 7.35 (d, 1.80H), 7.07 (m, 3.67H), 6.91 (d, 1.99H), 2.25 (d, 5.59H). GC-MS: 135.1.

***N-m-Tolylformamide (2c).***<sup>13</sup>

<sup>1</sup>H NMR (400 MHz, CDCl<sub>3</sub>, ppm):  $\delta$  8.61 (d, J = 11.4 Hz, 1H, trans), 8.41 (brs, J = 22.3 Hz, 0.88H, trans), 8.28 (d, J = 1.2 Hz, 0.75H, cis), 7.44 (brs, 0.71H, cis), 7.33 (s, 0.74H), 7.24 (d, 0.73H), 7.18-7.10 (m, 1.71H), 6.95 – 6.80 (m, 3.63H), 2.27 (d, 5.13H). GC-MS: 135.1.

***N-(4-Methoxyphenyl) formamide (2d).***<sup>13</sup>

<sup>1</sup>H NMR (400 MHz, CDCl<sub>3</sub>, ppm):  $\delta$  8.43 (d, J = 11.5 Hz, 1H, trans), 8.24 (d, J = 1.2 Hz, 1.07H, cis), 7.96 (brs, 0.92H, trans), 7.46-7.32 (m, 3.05H), 7.00-6.91 (m, 2.05H), 6.85-6.74 (m, 4.11H), 3.72 (d, 6.05H). GC-MS: 151.1.

***N-(4-Hydroxyphenyl) formamide (2e).***<sup>13</sup>

<sup>1</sup>H NMR (400 MHz, DMSO-*d*<sub>6</sub>, ppm):  $\delta$  9.95-9.79 (m, 1.27H), 9.26 (d, 1.31H), 8.51 (d, J = 11.2 Hz, 0.30H, trans), 8.17 (d, J = 1.9 Hz, 1.00H, cis), 7.38 (m, 1.98H), 7.02-6.94 (m, 0.63H), 6.71 (m, 2.64H). GC-MS:137.1.

***N-(4-Cyanophenyl) formamide (2f).***<sup>13</sup>

<sup>1</sup>H NMR (DMSO-*d*<sub>6</sub>, 500 MHz, ppm): (trans/cis=25/75),  $\delta$  10.59 (brs, 1H, cis), 10.47 (d, J = 10.2 Hz, 1H, trans), 8.93 (d, J = 10.5 Hz, 1H, trans), 8.31 (s, 1H, cis), 7.71 (q, J = 8.6 Hz, 2H, trans, 4H, cis), 7.32 (d, J = 7.7 Hz, 2H, trans). GC-MS: 146.1.1

***4-Formamidobenzoic acid (2g).***<sup>14</sup>

<sup>1</sup>H NMR (250 MHz, DMSO-*d*<sub>6</sub>, ppm):  $\delta$  12.73 (brs, 1H), 10.66 (s, 1H), 8.32 (s, 1H), 7.84 (d, 2H, J= 6.95, Ar-H), 7.65 (d, 2H, J= 8.67, Ar-H)). GC-MS: 165.1.

***Methyl 4-formamidobenzoate (2h).***<sup>15</sup>

<sup>1</sup>H NMR (CDCl<sub>3</sub>, 500 MHz, ppm): (trans/cis=45/55),  $\delta$  9.00 (br s, 1H, trans), 8.82 (d, J = 11.1 Hz, 1H, trans), 8.38 (s, 1H, cis), 8.23 (br s, 1H, cis), 7.98 (d, J = 8.5 Hz, 2H, trans), 7.95 (d, J = 8.6 Hz, 2H, cis), 7.61 (d, J = 8.6 Hz, 2H, cis), 7.12 (d, J = 8.6 Hz, 2H, trans), 3.87 (s, 3H, trans), 3.85 (s, 3H, cis). GC-MS: 179.1.

***N-(4-Acetylphenyl) formamide (2i).***<sup>15</sup>

<sup>1</sup>H NMR (CDCl<sub>3</sub>, 500 MHz, ppm): (trans/cis=35/65),  $\delta$  9.36 (d, J = 10.7 Hz, 1H, trans), 8.92 (d, J = 3.9 Hz, 1H, cis), 8.90 (brs, 1H, trans), 8.46 (d, J = 0.9 Hz, 1H, cis), 7.97 (d, J = 8.5 Hz, 2H, trans), 7.93 (d, J = 8.6 Hz, 2H, cis), 7.72 (d, J = 8.6 Hz, 2H, cis), 7.23 (d, J = 8.5 Hz, 2H, trans), 2.60 (s, 3H, trans), 2.59 (s, 3H, cis). GC-MS: 163.1.

***N*-(4-Vinylphenyl) formamide (2j).**<sup>16</sup>

<sup>1</sup>H NMR (500 MHz, CDCl<sub>3</sub>, ppm): δ 8.70 (d, J = 11.3 Hz, 1H), 8.37 (s, 1H), 8.24 (brs, 1H), 7.51 (d, J = 7.8 Hz, 2H), 7.39 (t, J = 9.2 Hz, 4H), 7.05 (d, J = 7.7 Hz, 2H), 6.68 (dd, J = 16.1, 12.3 Hz, 2H), 5.70 (dd, J = 17.5, 7.2 Hz, 2H), 5.23 (dd, J = 14.1, 11.3 Hz, 2H). GC-MS: 147.1.

**3-Formamidobenzoic acid (2k).**<sup>17</sup>

<sup>1</sup>H-NMR (DMSO-*d*<sub>6</sub>, 400.13 MHz, ppm): δ 10.35 (brs, 1H), 8.32 (d, 1H, 1.6 Hz), 8.06 (s, 1H), 7.74 (d, 1H, 7.8 Hz), 7.68 (d, 1H, 7.2 Hz), 7.29 (m, 1H). GC-MS: 165.1.

***N*-(4-Fluorophenyl) formamide (2m).**<sup>15</sup>

<sup>1</sup>H NMR (CDCl<sub>3</sub>, 500 MHz, ppm): (trans/cis=40/60), δ 8.58 (d, J = 11.3 Hz, 1H, trans), 8.36 (s, 1H, cis), 8.13 (br s, 1H, trans), 7.51 (dd, J = 9.0, 4.7 Hz, 2H, cis), 7.36 (br s, 1H, cis), 7.07 (d, J = 6.1 Hz, 4H, trans), 7.03 (t, J = 8.6 Hz, 2H, cis). GC-MS: 139.1.

***N*-(4-Chlorophenyl) formamide (2n).**<sup>15</sup>

<sup>1</sup>H NMR (CDCl<sub>3</sub>, 500 MHz, ppm): (trans/cis=40/60), δ 8.66 (d, J = 10.6 Hz, 1H, trans), 8.61 (br s, 1H, trans), 8.36 (s, 1H, cis), 7.66 (br s, 1H, cis), 7.50 (d, J = 8.7 Hz, 2H, cis), 7.33 (d, J = 8.6 Hz, 2H, trans), 7.29 (d, J = 8.7 Hz, 2H, cis), 7.04 (d, J = 8.6 Hz, 2H, trans). GC-MS: 155.5.

***N*-(4-Bromophenyl) formamide (2o).**<sup>13</sup>

<sup>1</sup>H NMR (400 MHz, CDCl<sub>3</sub>, ppm) δ 8.59 (d, J = 11.2 Hz, 0.74H, trans), 8.49 (brs, 0.64H, trans), 8.30 (s, 1H, cis), 7.56 (brs, 0.91H, cis), 7.43-7.32 (m, 5.43H), 6.91 (d, 1.44H). GC-MS: 200.0.

***N*-(3-Bromophenyl) formamide (2p).**<sup>13</sup>

<sup>1</sup>H NMR (400 MHz, CDCl<sub>3</sub>, ppm): δ 8.62 (d, J = 11.1 Hz, 0.83H, trans), 8.57 (brs, 0.67H, trans), 8.29 (d, J = 1.2 Hz, 1H, cis), 7.73 (t, J = 1.8 Hz, 1.01H), 7.64 (brs, 0.85H, cis), 7.38 (d, J = 8.0 Hz, 1.01H), 7.28-7.20 (m, 1.9H), 7.19-7.08 (m, 2.37H), 6.97 (dd, 0.80H). GC-MS: 200.0.

***N,N'*-(1,4-Phenylene) diformamide (2q).**<sup>18</sup>

<sup>1</sup>H NMR (400Hz, (CD<sub>3</sub>)<sub>2</sub>SO, ppm): δ 10.14-10.06 (m, 2.00H), 8.69 (minor rotamer, d, J = 11.2 Hz, 0.46H), 8.23 (major rotamer, d, J = 1.6 Hz, 1.54H), 7.54-7.52 (m, 3.10H), 7.15-7.13 (m, 0.90H). GC-MS: 164.1.

***N*-(pyridin-2-yl) formamide (2r).**<sup>18</sup>

<sup>1</sup>H NMR (400 MHz, CDCl<sub>3</sub>, ppm): δ 10.30 (minor rotamer, brs, 0.41H), 10.11 (major rotamer, br s, 0.59H), 9.34 (minor rotamer, d, J = 10.4 Hz, 0.43H), 8.55 (major rotamer, s, 0.57H), 8.35 (d, J = 4.4 Hz, 1.00H), 8.28 (d, J = 8.4 Hz, 0.57H), 7.76 (t, J = 7.8 Hz, 0.57H), 7.69 (t, J = 7.8 Hz, 0.43H), 7.13-7.07 (m, 1.00H), 6.95 (d, J = 8.0 Hz, 0.43H). GC-MS: 122.1.

***N*-(1H-Indol-5-yl) formamide (2s).**<sup>18</sup>

<sup>1</sup>H NMR (400 MHz, (CD<sub>3</sub>)<sub>2</sub>CO, ppm): δ 10.28 (major rotamer, br, 0.52H), 9.19 (minor rotamer, s, 0.48H), 8.69-8.66 (m, 0.30H), 8.36 (major rotamer, s, 0.70H), 8.18 (br d, J = 11.6 Hz, 0.27H), 8.04 (s, 0.63H), 7.44-7.32 (m, 2.88H), 7.02 (dd, J = 8.6, 1.8 Hz, 0.32H), 6.46-6.44 (m, 0.90H), 3.17 (s, 16 0.79H). GC-MS: 160.1.

***N*-(Quinolin-6-yl) formamide (2t).**<sup>13</sup>

<sup>1</sup>H NMR (400 MHz, DMSO-*d*<sub>6</sub>, ppm): δ 10.55 (s, 0.74H, cis), 10.48 (d, J = 10.8 Hz, 0.24H, trans), 8.99 (d, J = 10.8 Hz, 0.24H, trans), 8.79 (dd, J = 4.1, 1.6 Hz, 1H, cis), 8.40 (dd, 1.66H), 8.32-8.11 (m, 1.28H), 7.99 (d, 1.02H), 7.79 (dd, 0.81H), 7.76-7.61 (m, 0.56H), 7.52-7.43 (m, 1.02H). GC-MS: 172.1.

***N*-(8-Quinoliny) formamide (2v).**<sup>18</sup>

<sup>1</sup>H NMR (400 MHz, CDCl<sub>3</sub>, ppm): δ 9.81 (major rotamer, s, 0.79H), 9.47 (minor rotamer, br s, 0.10H), 9.14 (minor rotamer, d, J = 12.0 Hz, 0.11H), 8.83 (d, J = 4.0 Hz, 0.99H), 8.78-8.74 (m, 0.87H), 8.71 (major rotamer, s, 0.89H), 8.19 (d, J = 8.0 Hz, 0.99H), 7.59-7.47 (m, 3.13H). GC-MS:

***N*-(Naphthalen-1-yl) formamide (2w).**<sup>18</sup>

<sup>1</sup>H NMR (400 MHz, CDCl<sub>3</sub>, ppm): δ 8.90 (major rotamer, d, J = 8.8 Hz, 0.67H), 8.64 (major rotamer, d, J = 10.8 Hz, 0.75H), 8.61 (br s, minor rotamer, 0.25H), 8.04 (d, J = 8.0 Hz, 0.74H, HAr), 8.00 (d, J = 7.6 Hz, 0.29H), 7.91-7.78 (m, 2.32H), 7.71 (d, J = 8.0 Hz, 0.28H), 7.61-7.50 (m, 2.05H), 7.46 (t, J = 8.0 Hz, 1.05H), 7.31 (d, J = 7.2 Hz, 0.72H). GC-MS: 171.1.

***N*-(Naphthalene-2-yl) formamide (2x).**<sup>18</sup>

<sup>1</sup>H NMR (400 MHz, (CD<sub>3</sub>)<sub>2</sub>SO, ppm): δ 10.45-10.40 (m, 0.98H), 8.98 (minor rotamer, d, J = 10.8 Hz, 0.24H), 8.41 (major rotamer, s, 0.76H), 8.34 (s, 0.74H), 7.88-7.78 (m, 3.02H), 7.69 (s, 0.25H), 7.59 (d, J = 8.8 Hz, 0.75H), 7.49-7.38 (m, 2.22H). GC-MS: 171.1.

***N*-Ethyl formamide (2y).**<sup>18</sup>

<sup>1</sup>H NMR (CDCl<sub>3</sub>, 500 MHz, ppm): (trans/cis=15/85), δ 8.11 (s, 1H, cis), 8.05 (d, J = 12.1 Hz, 1H, trans), 7.10 (br s, 1H, cis), 6.78 (br s, 1H, trans), 3.34-3.29 (m, 2H, cis), 3.27 (dd, J = 9.4, 4.3 Hz, 2H, trans), 1.21 (t, J = 7.2 Hz, 3H, trans), 1.17 (t, J = 7.3 Hz, 3H, cis). GC-MS: 73.0.

***N*-Propyl formamide (2z).**<sup>19</sup>

<sup>1</sup>H NMR (501 MHz, DMSO-d<sub>6</sub>, ppm): δ 7.90 (s, 1H), 3.43 (s, 1H), 2.93 (d, J = 3.9 Hz, 2H), 1.31 (d, J = 10.6 Hz, 2H), 0.74 (d, J = 10.7 Hz, 3H). GC-MS: 87.1.

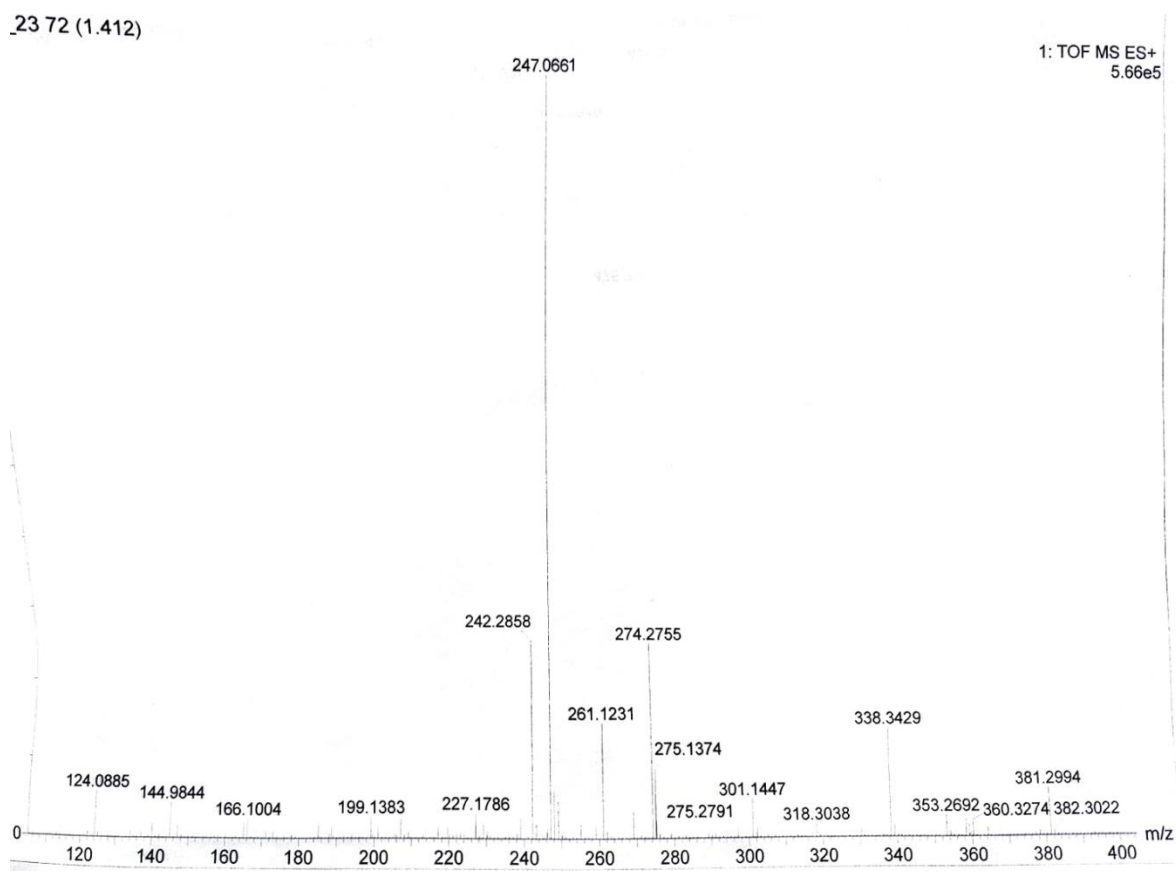

**Figure S17.** HRMS spectrum of Ph<sub>2</sub>SiO-SiH(OH)Ph. HRMS (ESI) m/z: calcd for C<sub>12</sub>H<sub>15</sub>O<sub>2</sub>Si [M+H]<sup>+</sup> 247.0611; found 247.0661.

(a)

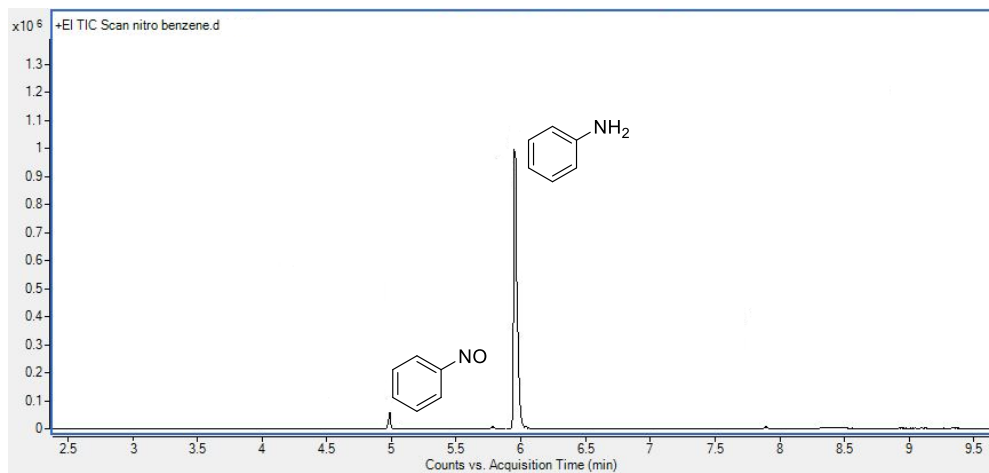

(b)

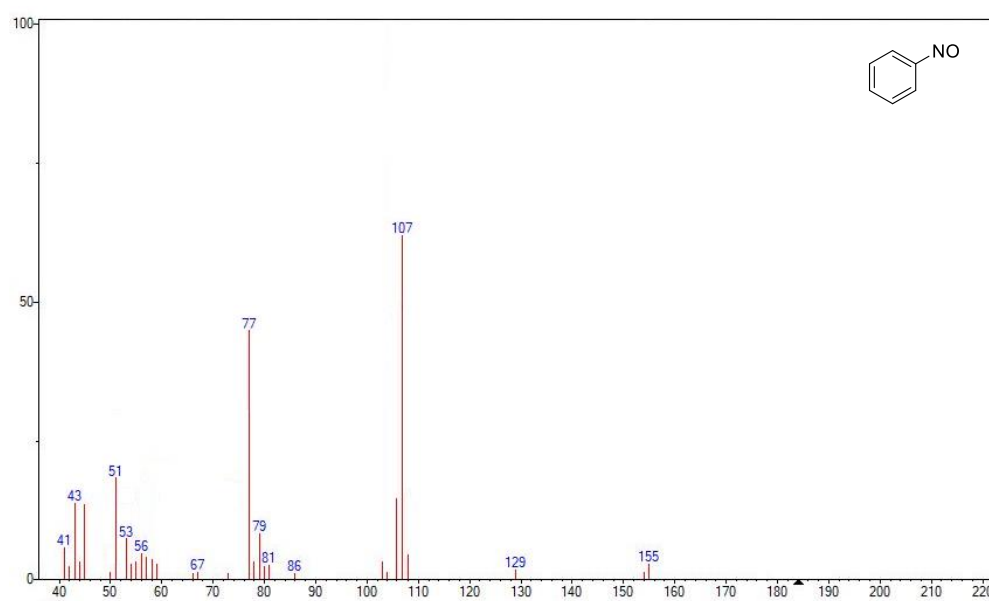

**Figure S18.** GC-MS spectra of the catalytic *N*-formylation of nitrobenzene mediated by UiO-67-CoH. Reaction conditions: UiO-67-CoH (4 mg, 0.25 mol% Co), 2.5 equiv. PhSiH<sub>3</sub>, 10 bar CO<sub>2</sub>, 3.0 mL THF, 120 °C for 10 h. The chromatographic peak at a retention time (RT) of 4.912 min corresponds to the nitrosobenzene intermediate generated in situ during the catalytic *N*-formylation reaction.

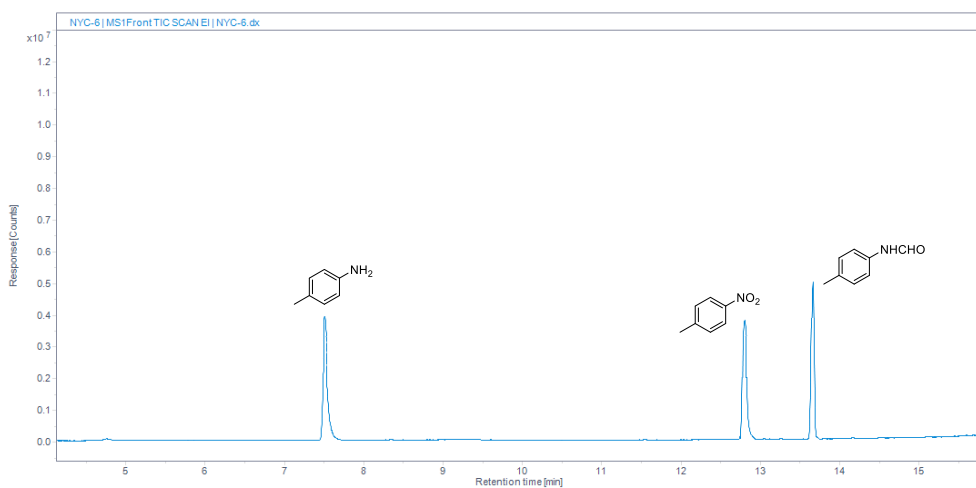

**Figure S19.** GC-MS spectra of the catalytic *N*-formylation of *p*-nitrotolune mediated by UiO-67-CoH. Reaction conditions: UiO-67-CoH (4 mg, 0.25 mol% Co), 2.5 equiv. PhSiH<sub>3</sub>, 5 bar CO<sub>2</sub>, 3.0 mL THF, 120 °C for 36 h.

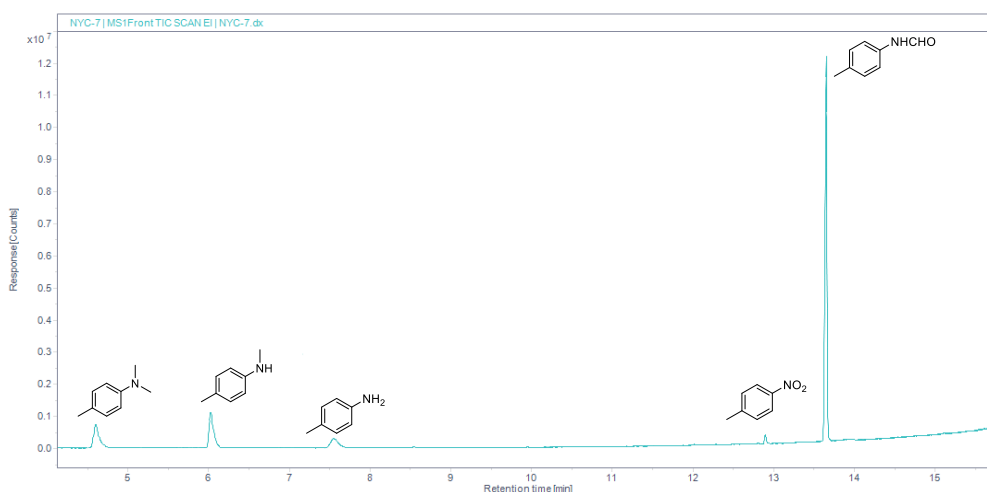

**Figure S20.** GC-MS spectra of the catalytic *N*-formylation of *p*-nitrotolune mediated by UiO-67-CoH. Reaction conditions: UiO-67-CoH (4 mg, 0.25 mol% Co), 2.5 equiv. PhSiH<sub>3</sub>, 15 bar CO<sub>2</sub>, 3.0 mL THF, 120 °C for 36 h.

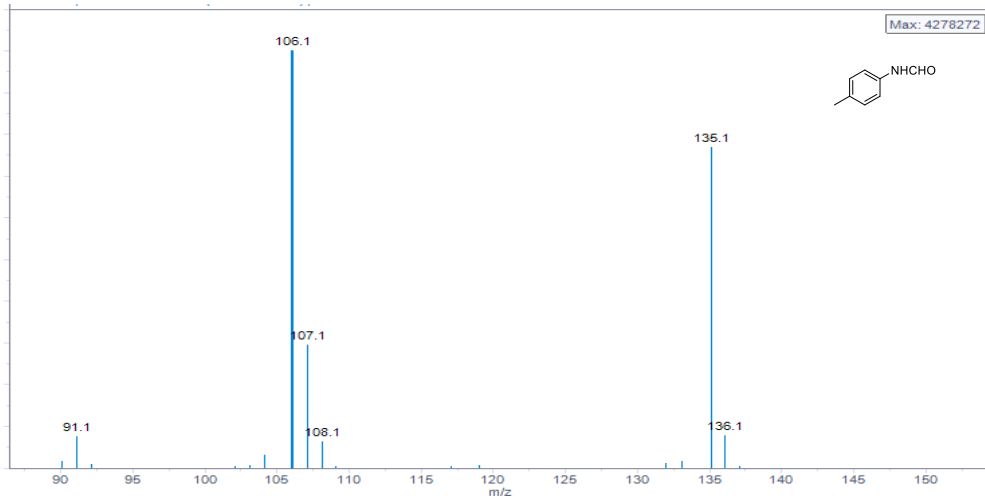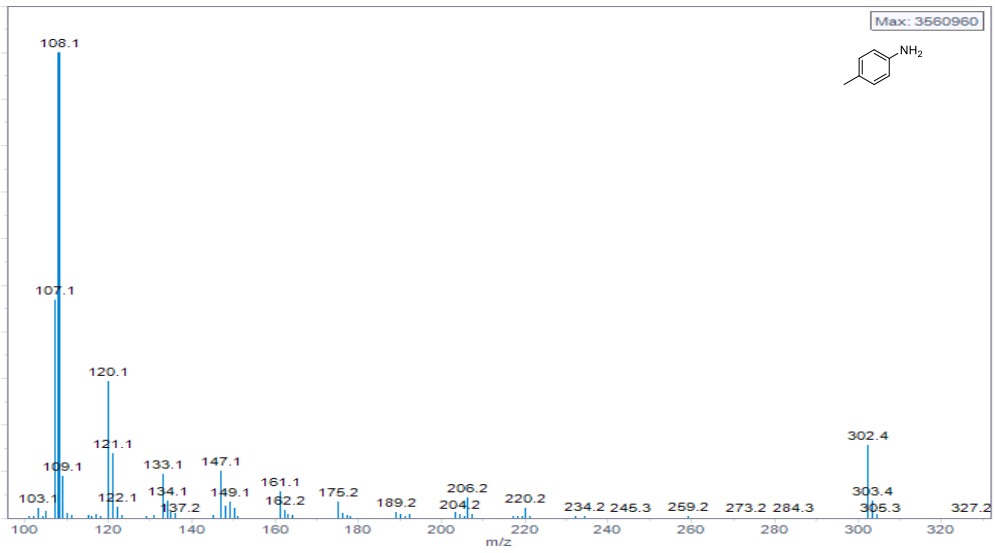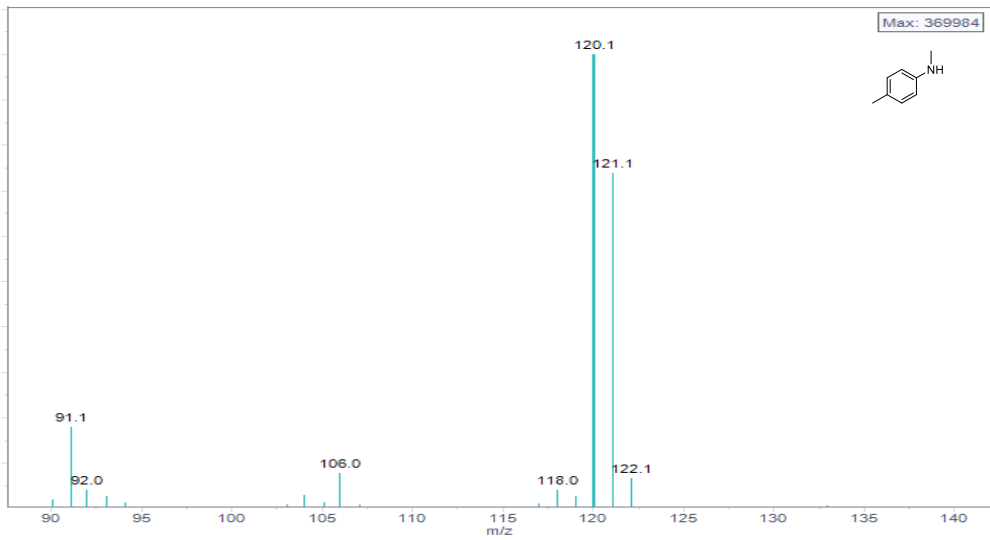

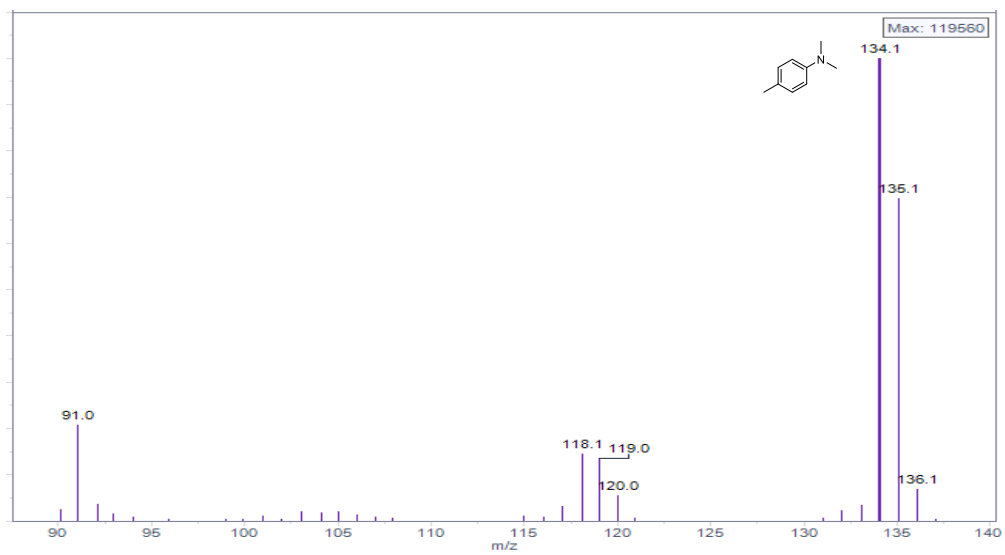

**Table S9. Comparison of the catalytic activity of UiO-67-CoH with that of other reported catalysts in *N*-formylation of nitro compounds.**

| SNo. | Reference                                                          | Catalyst                             | Conditions                                                                                 | C1 source                                                       | %Yield of <i>N</i> -formylated products |
|------|--------------------------------------------------------------------|--------------------------------------|--------------------------------------------------------------------------------------------|-----------------------------------------------------------------|-----------------------------------------|
| 1.   | <i>Green Chem.</i> , <b>2016</b> , 18, 1019-1022                   | AgPd@g-C <sub>3</sub> N <sub>4</sub> | 25 mg catalyst/1mmol nitro substrate/1 mL H <sub>2</sub> O/40-watt bulb/2 h                | HCOOH (2 mmol)                                                  | 75-99                                   |
| 3.   | <i>Adv. Synth. Catal.</i> , <b>2017</b> , 360, 432-437             | Pd@PS (8 mol% Pd)                    | 0.73 mmol nitro substrate/3 mL DMF/408 K/20 h                                              | HO <sub>2</sub> CCO <sub>2</sub> H.2 H <sub>2</sub> O (11 mmol) | 76-89                                   |
| 4.   | <i>Chem. Commun.</i> , <b>2018</b> , 54, 8913-8916                 | Co@NPC-800                           | 20 mg catalyst/0.25 mmol nitro substrate/2.5 mL THF/393 K/12 h                             | HCOONH <sub>4</sub> (25 mmol)                                   | 46-98                                   |
| 5.   | <i>Catal. Commun.</i> , <b>2019</b> , 129, 105747                  | CoNC-700                             | 9.5 mg catalyst/0.5 mmol nitro substrate/5 mL ACN/1 bar N <sub>2</sub> /110 °C/2 h         | HCOOH (5 mmol)                                                  | 20-95                                   |
| 6.   | <i>ChemCatChem</i> , <b>2020</b> , 12, 1546-1550                   | ZnNC-1000 (3 mol% Zn)                | 20 mg catalyst/ 0.5 mmol nitro substrate/2 mL THF/423 K/16 h                               | HCOOH (3 mmol)                                                  | 96                                      |
| 7.   | <i>Chem. Commun.</i> , <b>2020</b> , 56, 9620-9623                 | Fe nano powder                       | 1 mmol catalyst/0.5 mmol nitro substrate/ 1 mmol TMDSO/0.05 mmol KI/1.5 mL DMF/135 °C/28 h | CO <sub>2</sub> balloon                                         | 45-85                                   |
| 8.   | <i>ChemCatChem</i> , <b>2021</b> , 13, 3174-3183                   | ZnCo-N@C(ZIF-COF)                    | 30 mg catalyst/1 mmol nitro substrate/7 mL THF/413 K/8 h                                   | HCOOH (12 mmol)                                                 | 78-93                                   |
| 9.   | <i>ACS Appl. Mater. Interfaces</i> , <b>2022</b> , 14, 55568-55576 | Mn1-N/P-C                            | 20 mg catalyst/0.5 mmol nitro substrate/THF: H <sub>2</sub> O (1.5:0.5 mL)/393 K/12 h      | HCOOH (3 mmol)                                                  | 40-99                                   |
| 10.  | <i>ACS Appl. NanoMater.</i> ,                                      | Pd 1.5%/Ti-MOF                       | 30 mg photocatalyst/0.3 mmol nitro                                                         | HCOOH (8 equiv.)                                                | 92                                      |

|     |                                                                               |                                               |                                                                                                                                            |                              |              |
|-----|-------------------------------------------------------------------------------|-----------------------------------------------|--------------------------------------------------------------------------------------------------------------------------------------------|------------------------------|--------------|
|     | <b>2022</b> , 5,<br>464–475                                                   |                                               | substrate/3mL H <sub>2</sub> O/6<br>h/whiteLED(5W×4).                                                                                      |                              |              |
| 11. | <i>ACS Catal.</i><br><b>2023</b> , 13, 8372-<br>8383                          | ZrO <sub>2</sub> /C@1.<br>0-Co-NC             | 40 mg catalyst/ 1.0<br>mmol nitro<br>substrate/6.0 mmol<br>Ph <sub>2</sub> SiH <sub>2</sub> /2 mL DMF/<br>60 °C/24 h                       | 1 atm CO <sub>2</sub>        | 87-99        |
| 12. | <i>J.Catal.</i> , <b>2024</b> ,<br>440, 115826                                | meso-<br>phen-900                             | 50 mg catalyst/0.5<br>mmol nitro substrate/ 2<br>mL toluene/ 0.1 MPa<br>N <sub>2</sub> / 120 °C/12 h                                       | HCOOH (2.5<br>mmol)          | 60-89        |
| 13. | <i>Molecular<br/>Catalysis</i> , <b>2025</b> ,<br>572, 114792                 | 1.0% Co-<br>NPs/NC                            | 10 mg catalyst/0.5<br>mmol nitro substrate /3<br>mL toluene/373 K/5 h                                                                      | HCOOH (5<br>mmol)            | 99           |
| 14. | <i>ACS Sustainable<br/>Chem. Eng.</i><br><b>2025</b> , 13, 40,<br>16971–16980 | 20 mol %<br>TiCp <sub>2</sub> Cl <sub>2</sub> | 24.8mg catalyst/0.5<br>mmol nitro substrate/2<br>equiv. NaOMe/ 5<br>equiv. NH <sub>3</sub> ·BH <sub>3</sub> / 5 mL<br>of MeCN/ 100 °C/48 h | 10 bar CO <sub>2</sub>       | 54-78        |
| 15. | <b>This Work</b>                                                              | <b>UiO-67-<br/>CoH (0.75<br/>mol% Co)</b>     | <b>12 mg catalyst/1.3<br/>mmol nitro substrate/<br/>2.5 equiv. of PhSiH<sub>3</sub>/<br/>3.0 mL THF/120 °C,<br/>36 h</b>                   | <b>10 bar CO<sub>2</sub></b> | <b>55-94</b> |

## 9. References.

- 1 J. H. Cavka, S. Jakobsen, U. Olsbye, N. Guillou, C. Lamberti, S. Bordiga and K. P. Lillerud, *J. Am. Chem. Soc.*, 2008, **130**, 13850–13851.
- 2 Y. Bai, Y. Dou, L.-H. Xie, W. Rutledge, J.-R. Li and H.-C. Zhou, *Chem. Soc. Rev.*, 2016, **45**, 2327–2367.
- 3 D. Kowalkowska-Zedler, N. Nedelko, K. Kazimierczuk, P. Aleshkevych, R. Łyszczek, A. Ślowska-Waniewska and A. Pladzyk, *RSC Adv.*, 2020, **10**, 29100–29108.
- 4 J. Yang, H.-Q. Chen, N. Shi, T. Wang, J. Liu and W.-P. Pan, *Chem. Eng. J.*, 2022, **428**, 132095.
- 5 A. K. Poswal, A. Agrawal, A. K. Yadav, C. Nayak, S. Basu, S. R. Kane, C. K. Garg, D. Bhattachryya, S. N. Jha and N. K. Sahoo, N. K. Commissioning and First Results of Scanning Type EXAFS Beamline (BL-09) at INDUS-2 synchrotron source. *AIP Conf. Proc.* 2014, **1591**, 649–651.
- 6 B. Ravel and M. Newville, *J. Synchrotron Radiat.*, 2005, **12**, 537–541.
- 7 M. Araújo, B. Lasorne, A. L. Magalhães, G. A. Worth, M. J. Bearpark and M. A. Robb, *J. Chem. Phys.*, 2009, **131**, 144301.
- 8 V. Yempally, S. J. Kyran, R. K. Raju, W. Y. Fan, E. N. Brothers, D. J. Darensbourg and A. A. Bengali, *Inorg. Chem.*, 2014, **53**, 4081–4088.
- 9 P. Bhumla, M. Kumar and S. Bhattacharya, *Nanoscale Adv.*, 2021, **3**, 575–583.
- 10 S. Impeng, S. Siwaipram, S. Bureekaew and M. Probst, *Phys. Chem. Chem. Phys.*, 2017, **19**, 3782–3791.
- 11 S. Canneaux, F. Bohr and E. Henon, *J. Comput. Chem.*, 2014, **35**, 82–93.

- 12 E. R. Johnson and A. D. Becke, *J. Chem. Phys.*, 2006, **124**, 174104.
- 13 X. Dong, Z. Wang, Y. Duan and Y. Yang, *Chem. Commun.*, 2018, **54**, 8913–8916.
- 14 M. Hosseini-Sarvari and H. Sharghi, *J. Org. Chem.*, 2006, **71**, 6652–6654.
- 15 L. Yu, Q. Zhang, S. Li, J. Huang, Y. Liu, H. He and Y. Cao, *ChemSusChem*, 2015, **8**, 3029–3035.
- 16 M. Jia, H. Zhang, Y. Lin, D. Chen, Y. Chen and Y. Xia, *Org. Biomol. Chem.*, 2018, **16**, 3615–3624.
- 17 A. Syahrani, T. S. Panjaitan, G. Indrayanto and A. L. Wilkins, *J. Asian Nat. Prod. Res.*, 2000, **2**, 305–309.
- 18 J. Yin, J. Zhang, C. Cai, G.-J. Deng and H. Gong, *Org. Lett.*, 2019, **21**, 387–392.
- 19 D. Dan, F. Chen, W. Zhao, H. Yu, S. Han and Y. Wei, *Dalton Trans.*, 2021, **50**, 90–94.
